# Supplementary material for: Structural basis for species-selective targeting of Hsp90 in a pathogenic fungus
Source: PubMed Central journal article supplement (PMC6345968; doi:10.1038/s41467-018-08248-w), 2019-01-24
Supplement: 41467_2018_8248_MOESM1_ESM.pdf [file 41467_2018_8248_MOESM1_ESM.pdf]

## **Supplementary Information**

Structural basis for species-selective targeting of Hsp90 in a pathogenic fungus  
Whitesell et al.

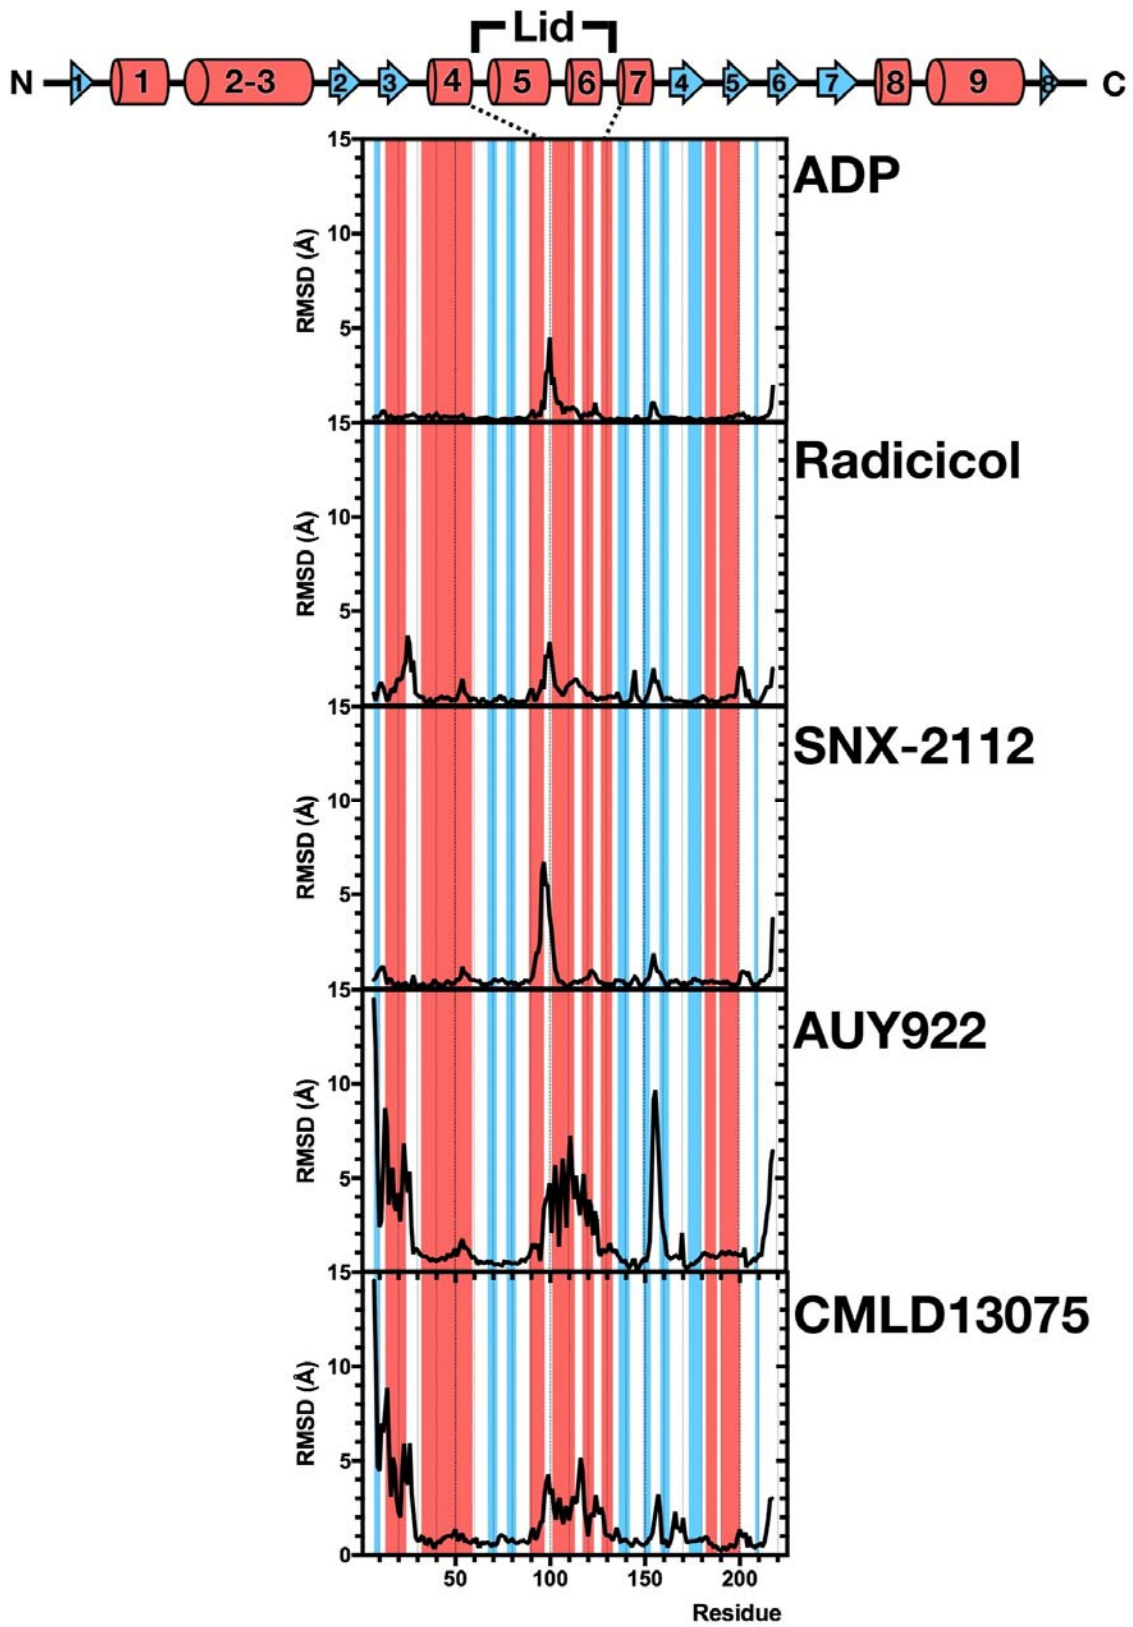

Supplementary Figure 1

1142 **Supplementary Figure 1**

1143 **RMSD differences observed for *C. albicans* NBD co-crystals.** Plot of the average r.m.s.d.  
1144 observed per residue for main-chains atoms upon comparing the structure of ligand-free *C.*  
1145 *albicans* Hsp90 NBD with all the protein-ligand co-crystal structures reported here. The color  
1146 shading represents the position of secondary structural elements in the *C. albicans* Hsp90 NBD  
1147 *apo* structure;  $\beta$ -strands (blue) and  $\alpha$ -helices (red) as depicted at the top of the graph. The  
1148 location and structural composition of the lid subdomain is indicated.

1149

## Biochemical characterization of *C. albicans* Hsp90

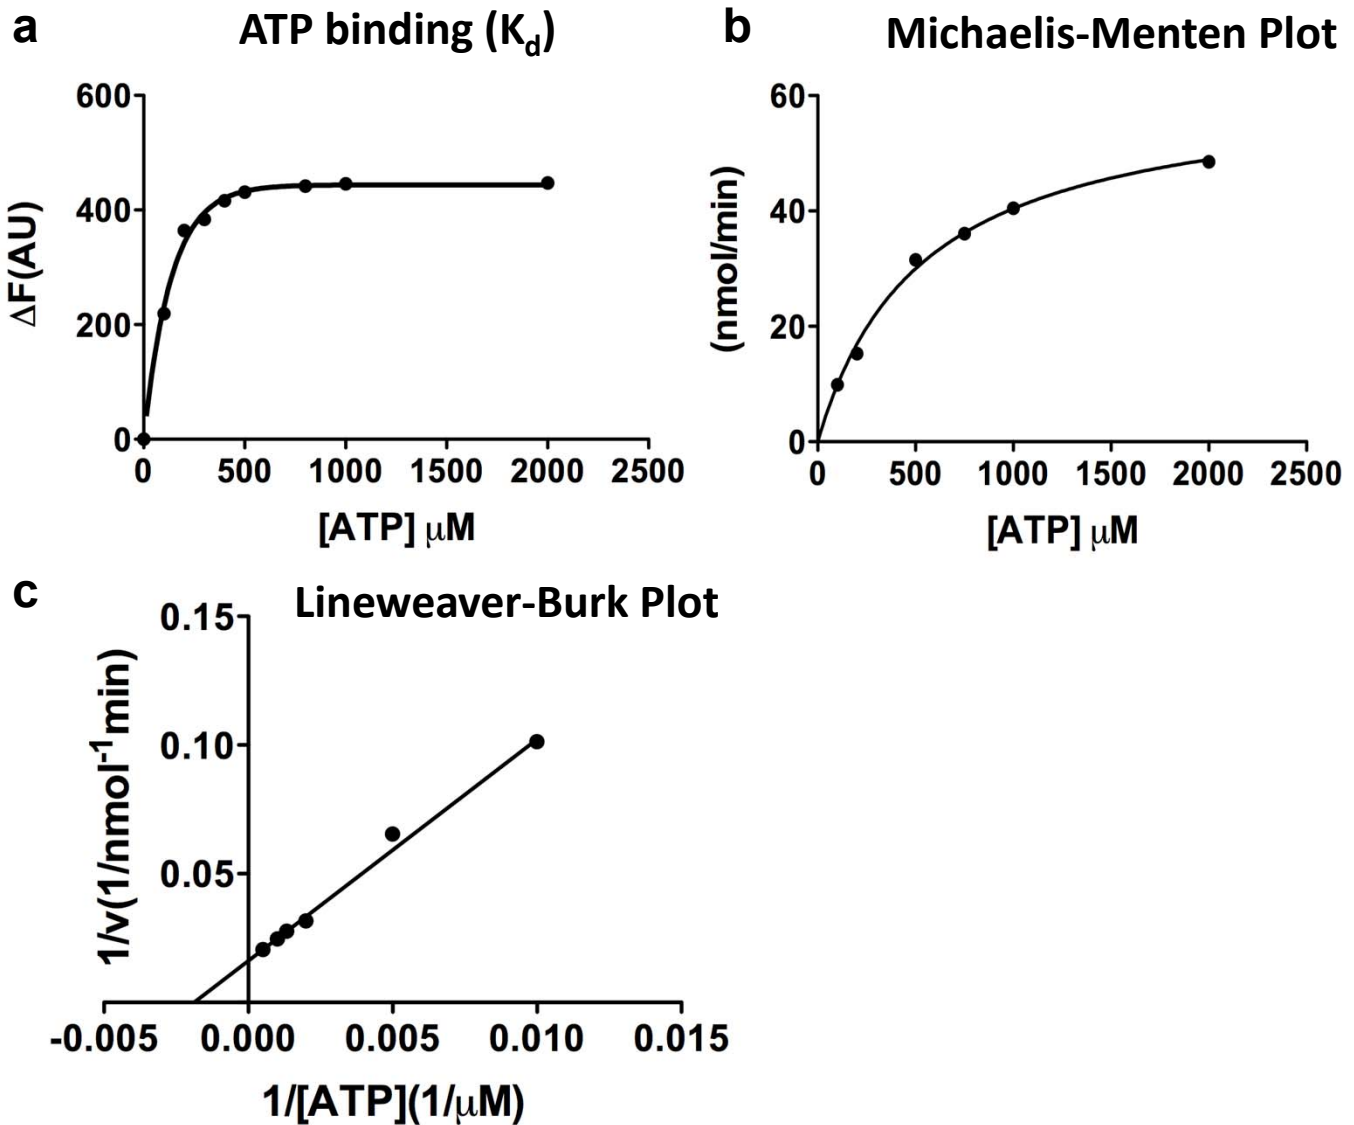

**d** **Comparison Summary**

| Organism                          | $K_m$ ( $\mu\text{M}$ ) | $K_{cat}$ ( $\text{min}^{-1}$ ) | $k_{cat}/K_m$ ( $\text{min}^{-1}\mu\text{M}^{-1}$ ) | $K_d$ ( $\mu\text{M}$ ) |
|-----------------------------------|-------------------------|---------------------------------|-----------------------------------------------------|-------------------------|
| <i>C. albicans</i>                | 533                     | $6.2 \times 10^{-2}$            | $11.6 \times 10^{-5}$                               | 125                     |
| <i>S. cerevisiae</i> <sup>a</sup> | 511                     | $8.0 \times 10^{-2}$            | $15.6 \times 10^{-5}$                               | 132                     |
| Human <sup>a</sup>                | 324                     | $1.5 \times 10^{-2}$            | $4.6 \times 10^{-5}$                                | 240                     |

<sup>a</sup> Data from: Owen, B. A. L. et al. Regulation of heat shock protein 90 ATPase activity by sequences in the carboxyl terminus. *J. Biol. Chem.* **277**, 7086–7091 (2002)

1150 **Supplementary Figure 2**

1151 **Biochemical characterization of *C. albicans* Hsp90.** **a**, Binding of *C. albicans* Hsp90 to its  
1152 natural ligand ATP. **b**, Michaelis-Menten plot correlating the rate of ATP hydrolysis by *C.*  
1153 *albicans* Hsp90 with concentration of substrate. Fractional cleavage of  $\gamma$ -<sup>32</sup>P-labeled ATP is  
1154 plotted against ATP concentration. **c**, Lineweaver-Burk plot performed to define  $K_m$  and  $k_{cat}$  for  
1155 the ATPase activity of *C. albicans* Hsp90. **d**, Comparison of parameters determined for *C.*  
1156 *albicans* Hsp90 with previously published data for homologous human and yeast (*S. cerevisiae*)  
1157 proteins.

1158

**a** Affinity of fluorescence polarization (FP) probe for nucleotide binding domains (NBD)

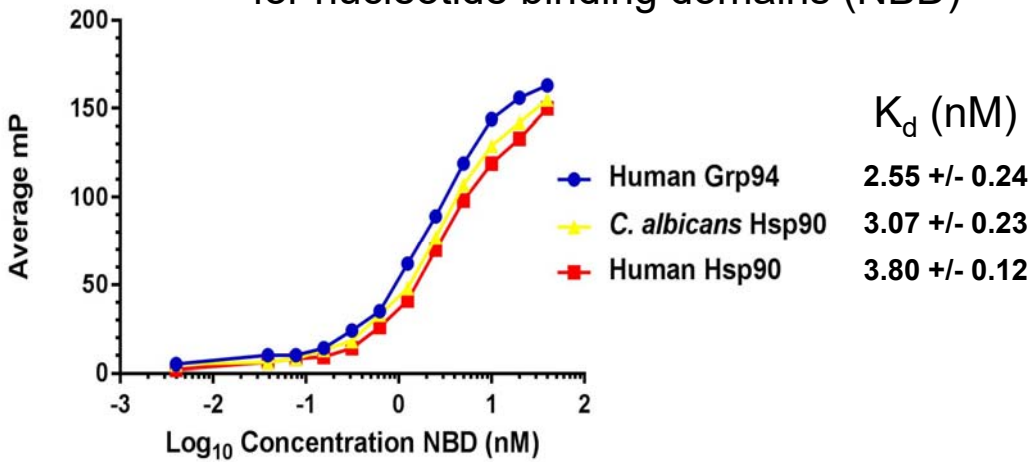

**b** Affinity of inhibitors for nucleotide binding domains ( $K_i$ , nM)

| Compound     | Human Hsp90  | <i>Candida</i> Hsp90 | Human Grp94   |
|--------------|--------------|----------------------|---------------|
| geldanamycin | 4.9 +/- 0.51 | 5.6 +/- 0.66         | 4.1 +/- 0.29  |
| AUY922       | <0.1         | 0.2 +/- 0.03         | 0.9 +/- 0.04  |
| SNX-2112     | 0.9 +/- 0.03 | 0.3 +/- 0.05         | 63.8 +/- 8.40 |

**c** Relative inhibitor potency in whole cell lysates by FP assay

| FP $EC_{50}$ (nM)  | geldanamycin (GdA) | AUY922        | SNX-2112      |
|--------------------|--------------------|---------------|---------------|
| Human              | 18.9 +/- 0.95      | 18.7 +/- 0.51 | 92.0 +/- 7.73 |
| <i>C. albicans</i> | 18.9 +/- 0.95      | 11.2 +/- 0.17 | 11.5 +/- 0.48 |

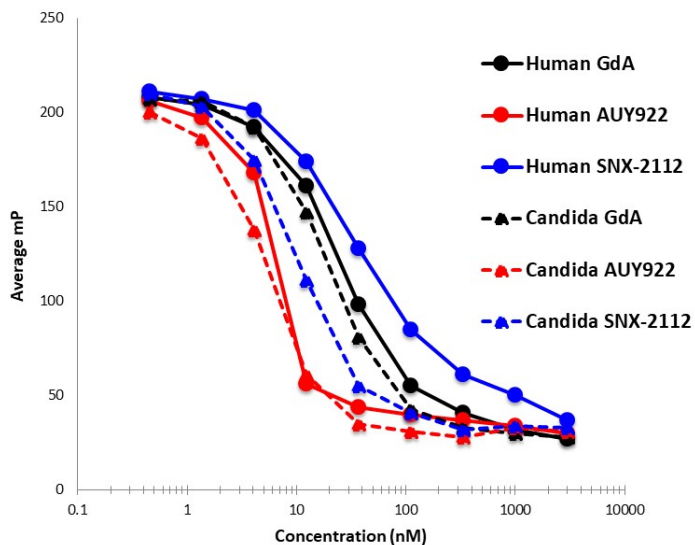

*Representative equilibrium binding displacement curves from a single FP experiment.*

1159 **Supplementary Figure 3**

1160 **Determination of NBD binding affinities by FP. a**, Saturation binding of fluorescent probe  
1161 (Cy3-geldanamycin) to purified NBDs derived from human Grp94 and Hsp90 as well fungal  
1162 Hsp90 was measured as a decrease in millipolarization (mP) units. The anisotropy of a fixed  
1163 concentration of probe (0.1 nM) was measured over a range of NBD concentrations to  
1164 determine  $IC_{50}$  values by variable slope 4-parameter curve fitting of duplicate determinations at  
1165 each concentration tested ( $R^2 > 0.98$ , all curves).  $K_d$  values were calculated from these data  
1166 using previously published methods. FP assays were repeated in 3 independent experiments.  
1167 The mean +/- SEM is presented. **b**, Equilibrium competition binding FP assays were performed  
1168 with purified NBDs to determine the  $K_i$  of inhibitors using the probe dissociation constants  
1169 defined in panel **a** and previously published methods. Of note, the affinity of fluorescently  
1170 labeled probe determined by saturation binding agrees well with the affinity of unlabeled  
1171 geldanamycin as determined by equilibrium competition binding. All FP assays were repeated in  
1172 3 independent experiments. The mean +/- SEM is presented. **c**, Concentration-dependent  
1173 displacement of fluorescent probe (decrease in millipolarization (mP) units) by test compounds  
1174 was measured to determine relative Hsp90 binding affinity in cytosolic extracts prepared from  
1175 human (HEPG2) vs. *C. albicans* (SC5314) cells.  $EC_{50}$  values were determined by variable slope  
1176 4-parameter curve fitting of duplicate determinations at each concentration tested ( $R^2 > 0.95$ , all  
1177 curves). The indicated fungal  $EC_{50}$ s were normalized by the ratio of geldanamycin  $EC_{50}$ s  
1178 measured in human/fungal lysate to account for disparity in probe affinity between lysates and  
1179 enable more accurate comparison. All FP assays were repeated in 3 independent experiments.  
1180 The mean +/- SEM is presented in tabular form. Representative equilibrium binding  
1181 displacement curves from a single experiment are presented below the table. Source data for  
1182 the determination of all  $K_d$ ,  $K_i$  and  $EC_{50}$  values are provided as a source data file.

1183

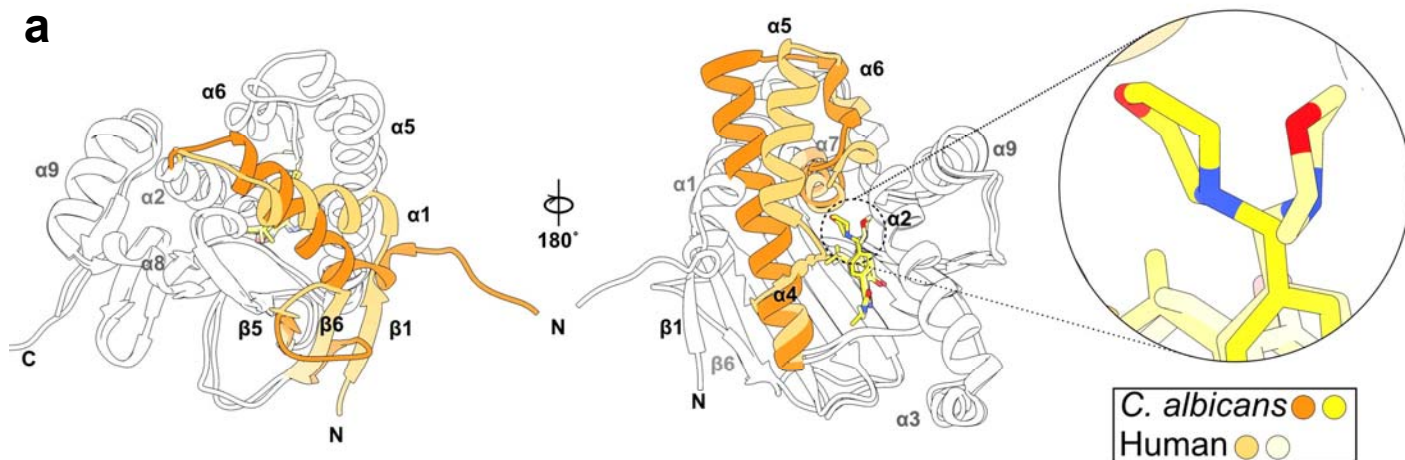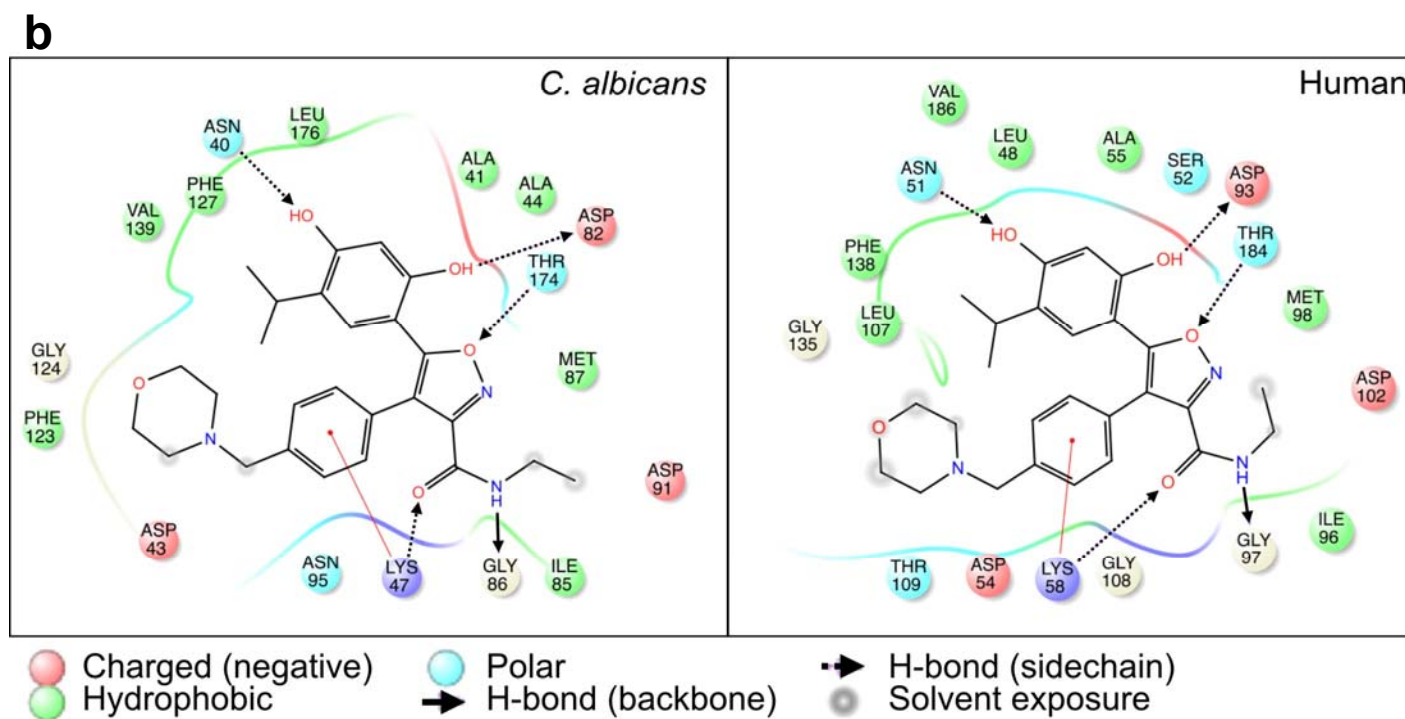

Supplementary Figure 4



1184 **Supplementary Figure 4**

1185 **Structure of *C. albicans* and human NBD in complex with AUY922.** **a**, Overlay of *C.*  
1186 *albicans* Hsp90 and human Hsp90 $\alpha$  NBD in complex with AUY922. Two orthogonal views of a  
1187 ribbon representation are shown to indicate structural differences; the colored secondary  
1188 structure elements highlight the differences between the *C. albicans* (orange/gold) and human  
1189 (clay/light yellow) structures. A zoomed-in view of the morpholine ring orientation in both  
1190 complexes is also shown. **b**, Ligand interaction map for the fungal (left) and human (right)  
1191 complexes, all amino acid residues within 3.5Å of the inhibitor are indicated, and color coded  
1192 accordingly to their physicochemical properties: charged (red), hydrophobic (green) and polar  
1193 (cyan). Hydrogen-bond interactions between amino acids within the protein and ligand atoms  
1194 are indicated by black arrows, the arrow indicates the direction of the interaction, donor to  
1195 acceptor.

1196

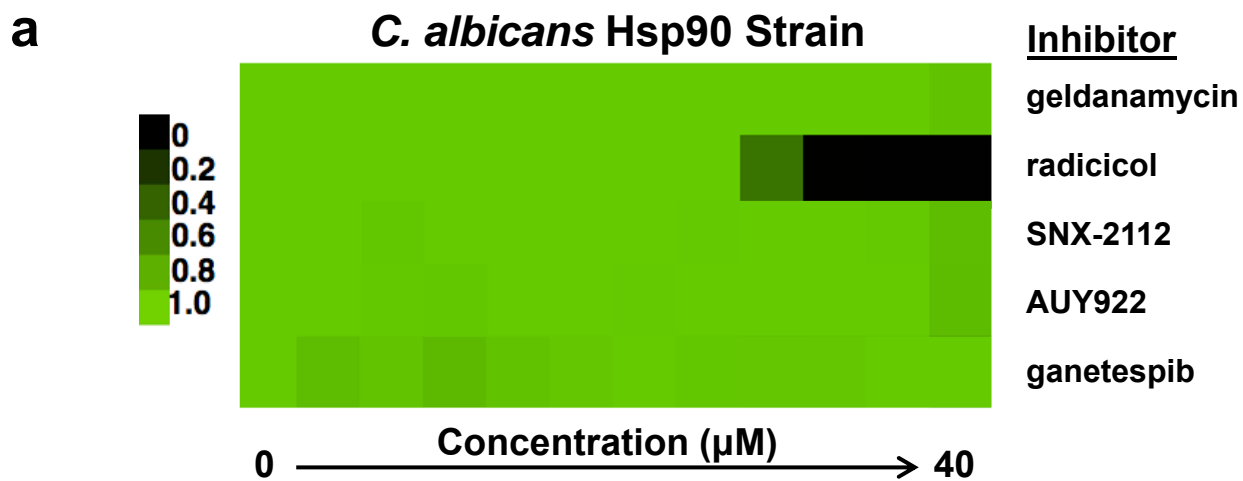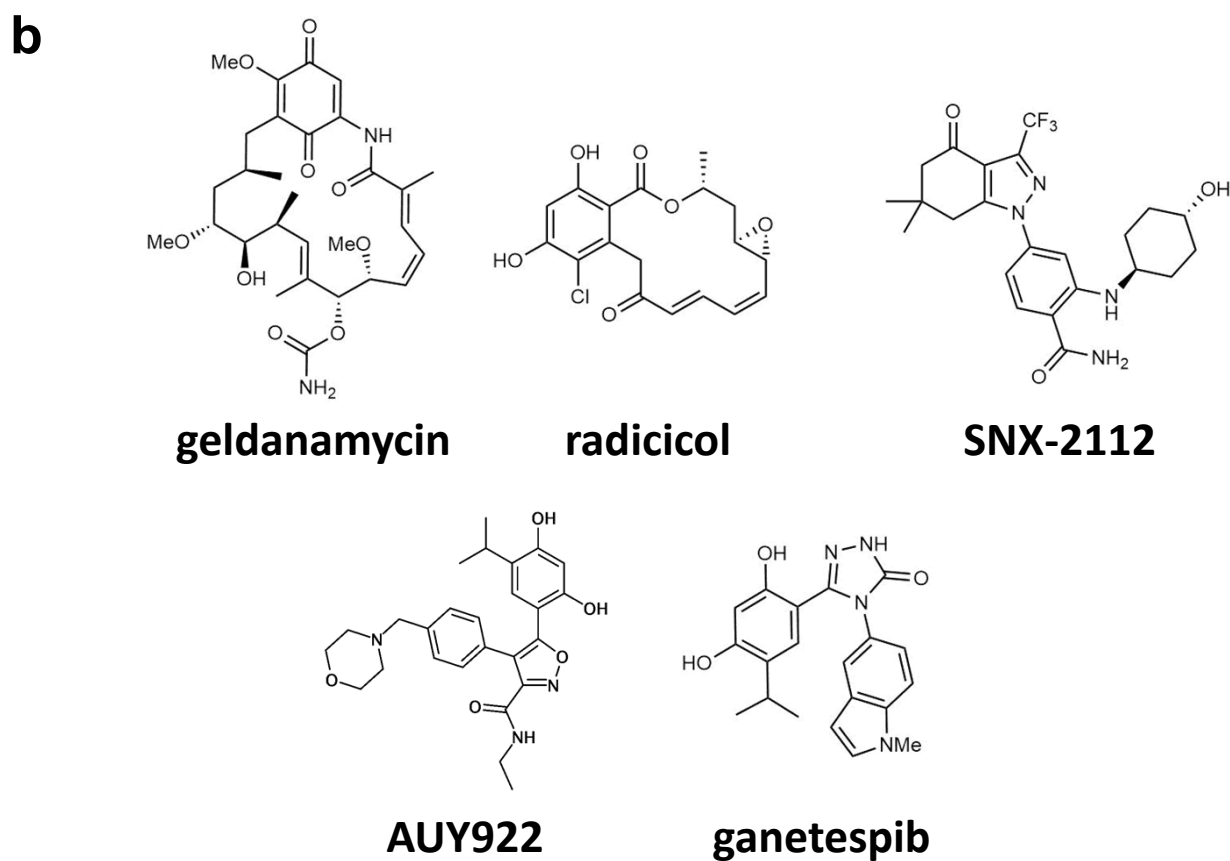

Supplementary Figure 5

1197 **Supplementary Figure 5**

1198 **Activity of known inhibitors against yeast expressing *C. albicans* Hsp90.** **a**, Relative  
1199 growth inhibition over a 2-fold dilution series of concentrations for each compound is displayed  
1200 in heat-map format. Each colored box represents the mean of duplicate determinations. Color  
1201 scale bar for relative growth is provided to the left, green: no inhibition to black: complete  
1202 inhibition. The experiment was repeated in an independent biological replicate to confirm  
1203 results. **b**, Chemical structures of inhibitors tested.

1204

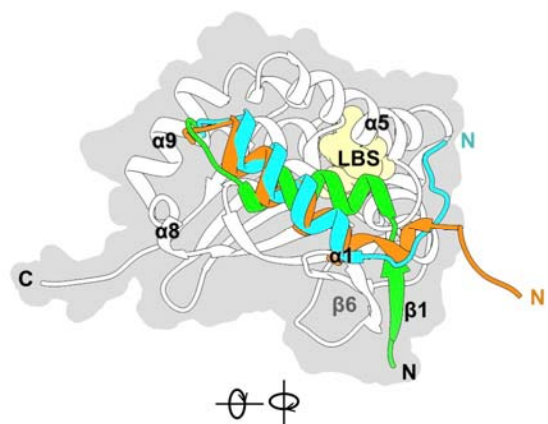

|                      |    | β1     | α1                  | α2                |
|----------------------|----|--------|---------------------|-------------------|
| AUY922               |    | →      | →                   | →                 |
| CMLD013075           |    | →      | →                   | →                 |
| SNX-2112             |    | →      | →                   | →                 |
| ADP                  |    | →      | →                   | →                 |
| apo                  |    | →      | →                   | →                 |
| <i>C. albicans</i>   | 1  | MADAKV | ETHEFAEISQLMSLIINTV | YSNKEIFLRELISNASD |
| <i>C. neoformans</i> | 1  | ...MST | ETFGFAEISQLLDLIINTF | YSNKEIFLRELISNSD  |
| <i>A. Fumigatus</i>  | 1  | ...MSS | ETFEFAEISQLLSLIINTV | YSNKEIFLRELISNASD |
| <i>S. cerevisiae</i> | 1  | ...MAS | ETFEFAEITQLMSLIINTV | YSNKEIFLRELISNASD |
| Human - Hsp90beta    | 7  | HGEEEV | ETFAFAEITQLMSLIINTF | YSNKEIFLRELISNASD |
| Human - Hsp90alfa    | 12 | MEEEEV | ETFAFAEITQLMSLIINTF | YSNKEIFLRELISNASD |

|                      |    | α3                 | β2               | β3                 | α4 |
|----------------------|----|--------------------|------------------|--------------------|----|
| AUY922               |    | →                  | →                | →                  | →  |
| CMLD013075           |    | →                  | →                | →                  | →  |
| SNX-2112             |    | →                  | →                | →                  | →  |
| ADP                  |    | →                  | →                | →                  | →  |
| apo                  |    | →                  | →                | →                  | →  |
| <i>C. albicans</i>   | 51 | QALSDPSQLSESEPELFR | IRITPKQDKRVHETIR | DSGIGMTKALVNNLGTIA |    |
| <i>C. neoformans</i> | 48 | AALTDPSQLDSEKDLRY  | IRIPNKEEGTITIR   | DSGIGMTKALVNNLGTIA |    |
| <i>A. Fumigatus</i>  | 48 | QSLSDPTKLDITGKDLR  | TDIPDKNKTTITIR   | DSGIGMTKALVNNLGTIA |    |
| <i>S. cerevisiae</i> | 48 | KSLSDPKQLDETPELDF  | TRITPKPEQKVTITIR | DSGIGMTKALVNNLGTIA |    |
| Human - Hsp90beta    | 57 | ESLTDPSKLDSSGKELR  | TDIPNPOERTITLV   | DSGIGMTKALVNNLGTIA |    |
| Human - Hsp90alfa    | 62 | ESLTDPSKLDSSGKELR  | TDIPNPKQDRITLV   | DSGIGMTKALVNNLGTIA |    |

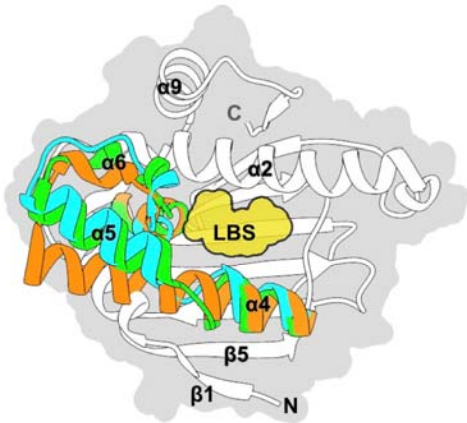

|                      |     | α5            | α6                 | α7             | β4      |
|----------------------|-----|---------------|--------------------|----------------|---------|
| AUY922               |     | →             | →                  | →              | →       |
| CMLD013075           |     | →             | →                  | →              | →       |
| SNX-2112             |     | →             | →                  | →              | →       |
| ADP                  |     | →             | →                  | →              | →       |
| apo                  |     | →             | →                  | →              | →       |
| <i>C. albicans</i>   | 101 | RSGTRSFMEALS  | SGADSMIGQFVGVGFYSL | FLVADHVGVISKHN | DDDEQYV |
| <i>C. neoformans</i> | 98  | RSGTRSFMEALS  | SGADSMIGQFVGVGFYSS | FLVAEKVGVVTKHN | DDDEQYI |
| <i>A. Fumigatus</i>  | 98  | RSGTRSFMEALS  | SGADSMIGQFVGVGFYSA | FLVADRVVVSKN   | DDDEQYI |
| <i>S. cerevisiae</i> | 98  | RSGTRSFMEALS  | SGADSMIGQFVGVGFYSL | FLVADRVVVISKSN | DDDEQYI |
| Human - Hsp90beta    | 107 | RSGTRSFMEALQA | SGADSMIGQFVGVGFYSA | FLVADRVVVISKSN | DDDEQYA |
| Human - Hsp90alfa    | 112 | RSGTRSFMEALQA | SGADSMIGQFVGVGFYSA | FLVAEKVGVVTKHN | DDDEQYA |

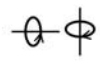

|                      |     | β5        | β6           | β7        | α8             | α9        |
|----------------------|-----|-----------|--------------|-----------|----------------|-----------|
| AUY922               |     | →         | →            | →         | →              | →         |
| CMLD013075           |     | →         | →            | →         | →              | →         |
| SNX-2112             |     | →         | →            | →         | →              | →         |
| ADP                  |     | →         | →            | →         | →              | →         |
| apo                  |     | →         | →            | →         | →              | →         |
| <i>C. albicans</i>   | 151 | WESNAGGCF | FTVITLDETNER | GRGTRMRF  | FLKEDDQLEYLERR | IKREVVKRE |
| <i>C. neoformans</i> | 148 | WESNAGGCF | FTITDTEGPR   | GRGTRMKRF | FLKEDDQLEYLERR | IKREVVKRE |
| <i>A. Fumigatus</i>  | 148 | WESNAGGCF | FTITDTEGQV   | GRGTRKIL  | FLKEDDQLEYLERR | IKREVVKRE |
| <i>S. cerevisiae</i> | 148 | WESNAGGCF | FTVITLDEVNER | GRGTRILR  | FLKEDDQLEYLERR | IKREVVKRE |
| Human - Hsp90beta    | 157 | WESNAGGCF | TVRAD.HGEP   | GRGTRKVL  | HLKEDDQLEYLERR | IKREVVKRE |
| Human - Hsp90alfa    | 162 | WESNAGGCF | TVRTD.TGEP   | GRGTRKVL  | HLKEDDQLEYLERR | IKREVVKRE |

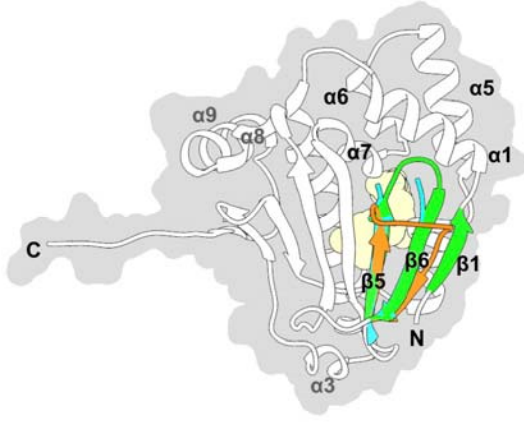

|                      |     | β8    |
|----------------------|-----|-------|
| AUY922               |     | →     |
| CMLD013075           |     | →     |
| SNX-2112             |     | →     |
| ADP                  |     | →     |
| apo                  |     | →     |
| <i>C. albicans</i>   | 201 | SBFVA |
| <i>C. neoformans</i> | 198 | SBFIS |
| <i>A. Fumigatus</i>  | 198 | SBFIS |
| <i>S. cerevisiae</i> | 198 | SBFVA |
| Human - Hsp90beta    | 206 | SQFIC |
| Human - Hsp90alfa    | 211 | SQFIC |

Supplementary Figure 6

1205 **Supplementary Figure 6**

1206 **Ligand-associated rearrangements within the *C. albicans* NBD. *Left column*,** Orthogonal  
1207 views of partial ribbon representations of the Hsp90 NBD when observed in complex with  
1208 CMLD013075 (aqua) or AUY922 (orange). For each view, a limited region of the protein is  
1209 colored to highlight conformational changes from the *apo* structure. The conformation of the *apo*  
1210 (green) state determined from an independent *C. albicans* crystal structure is overlaid, and its  
1211 overall contour depicted in gray. The green section matches the colored complex structures and  
1212 white ribbons represent the rest of the *apo* structure. The ligand binding site (LBS) is indicated  
1213 in yellow. ***Right column*,** Alignment of amino acid sequences making up the Hsp90 NBD in  
1214 diverse fungi and humans. Color scheme: Red background shading indicates perfectly  
1215 conserved positions, positions with variation are indicated in red letters when a particular  
1216 residue is the most common and black letters when the position is more variable. Red shading  
1217 of white letters indicates completely conserved positions. To highlight the extent of structural  
1218 variation that occurs in the absence of sequence variability, the secondary structures observed  
1219 for *C. albicans* NBD in the *apo* state or in complex with various inhibitors is mapped above the  
1220 sequence alignment. The secondary structures observed for human Hsp90 $\alpha$  are indicated in  
1221 black below the sequence alignment. Gray shading highlights the portion of the alignment that is  
1222 depicted in drawings to left.

1223

**a**

3T3 cell cytotoxicity

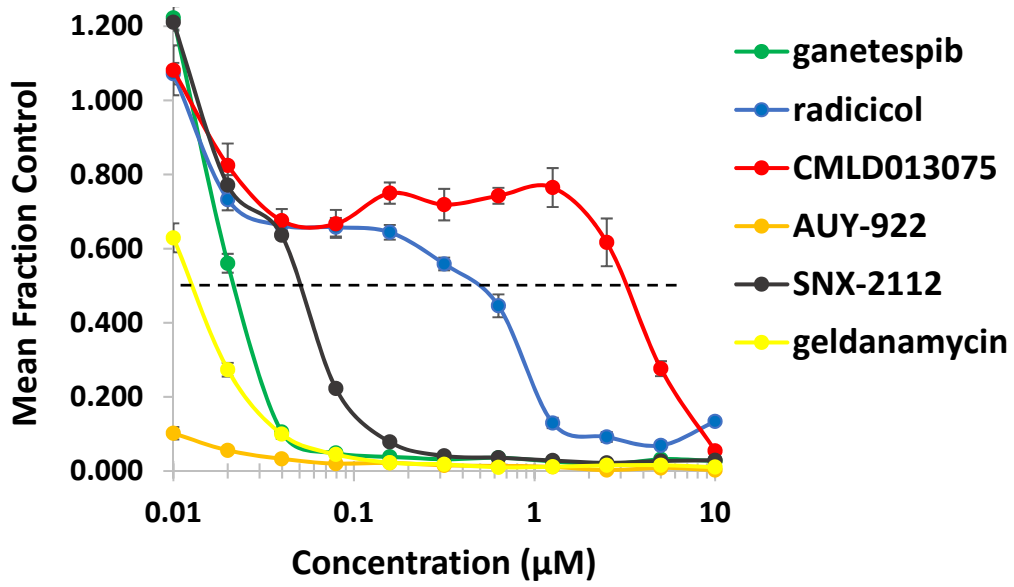

**b**

Relative inhibitor potency in whole cell lysates by FP assay

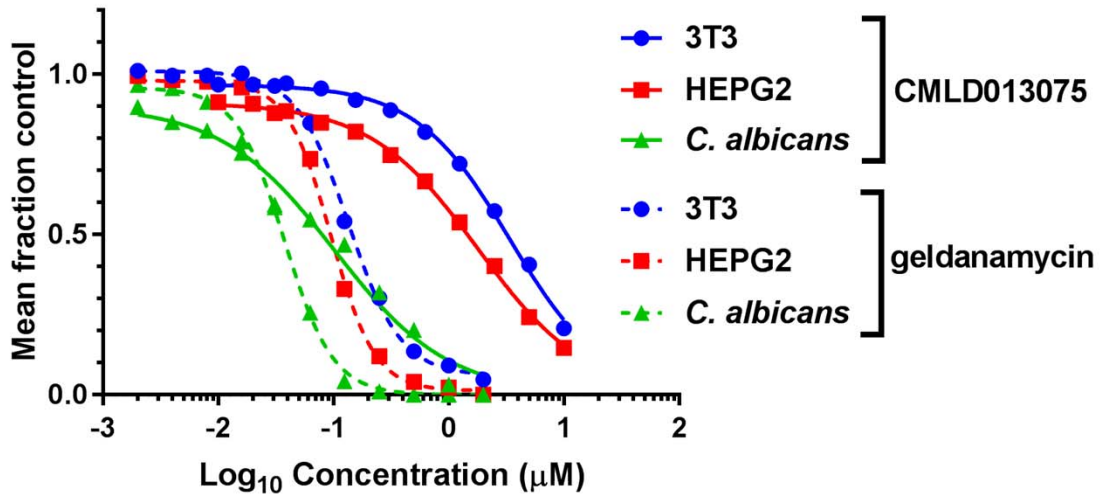

1224 **Supplementary Figure 7**

1225 **Fungal selectivity of CMLD013075 reduces mammalian cell toxicity.** **a**, Concentration-  
1226 dependent inhibition of 3T3 mouse fibroblast growth and survival after 3-day culture with Hsp90  
1227 inhibitors. Data points depict the mean of triplicate determinations, Dashed line depicts 50%  
1228 inhibition of growth/survival. Error bars, SD. The experiment was repeated once with  
1229 quantitatively similar results. **b**, Relative concentration-dependent displacement of fluorescent  
1230 probe by CMLD013075 (solid traces) and geldanamycin (dashed traces) is plotted to measure  
1231 relative Hsp90 binding affinity in cytosolic extracts prepared from non-cancer derived fibroblasts  
1232 (3T3), cancer-derived liver cells (HEPG2) and fungal (*C. albicans*) cells. In contrast to  
1233 geldanamycin, CMLD013075 demonstrates higher binding affinity in fungal than mammalian  
1234 lysates with the lowest binding affinity for the compound seen in non-cancer derived 3T3 cells.  
1235 Variable slope 4-parameter curve fitting of duplicate determinations at each concentration tested  
1236 is presented ( $R^2 > 0.96$ , all curves). The experiment was repeated as an independent biological  
1237 replicate to confirm findings. Source data for the curve fittings are provided as a source data file.  
1238

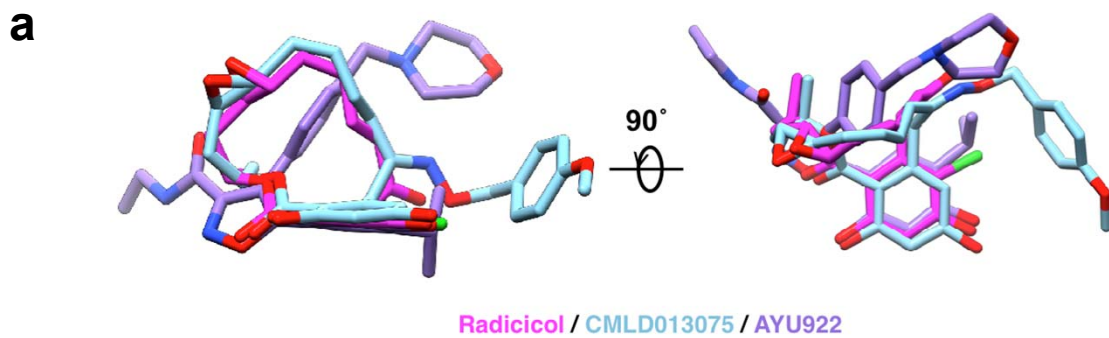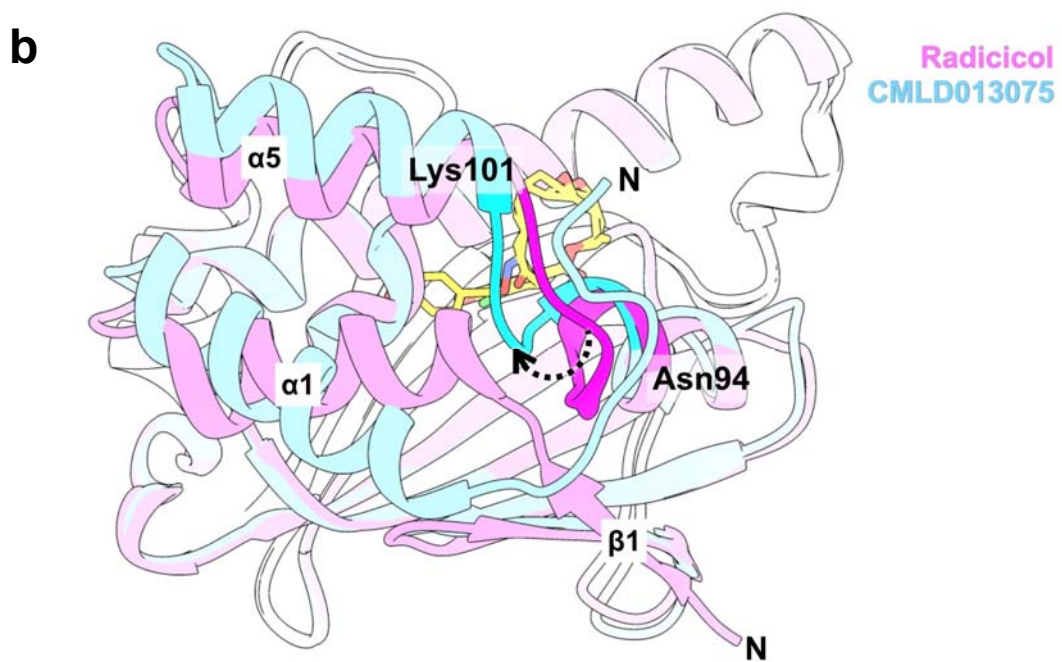

Supplementary Figure 8



1239 **Supplementary Figure 8**

1240 **Partial remodeling of fungal NBD to accommodate binding of CMLD013075.** **a**, Orthogonal  
1241 views of an overlay of the conformations determined for three different resorcinol-containing  
1242 compounds when in complex with *C. albicans* Hsp90 NBD. **b**, Ribbon representation of *C.*  
1243 *albicans* Hsp90 NBD in complex with radicicol (magenta) and CMLD013075 (cyan) to indicate  
1244 the bulged-in position of the Asn94-Lys101 region. The remainders of the structures are shown  
1245 as lighter colored ribbons.

1246

**a** Checkerboard growth inhibition assay in liquid medium

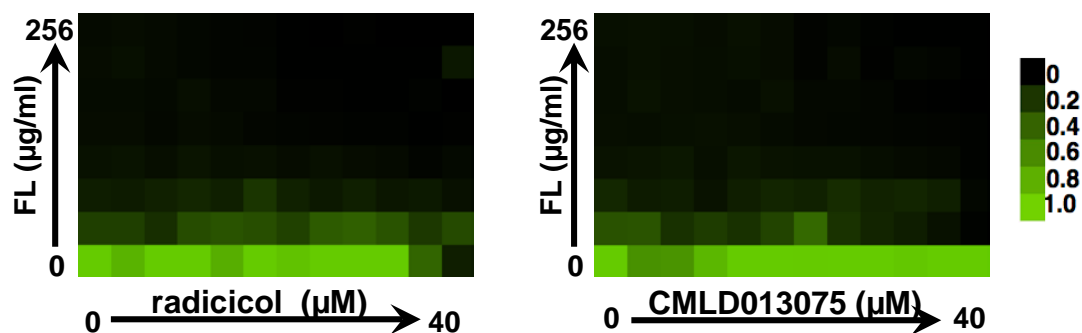

**b** Survival post exposure (no compounds present)

Previous Exposures

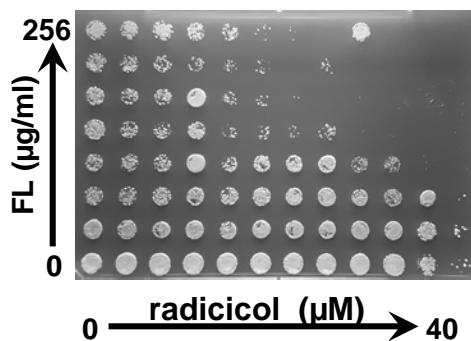

Previous Exposures

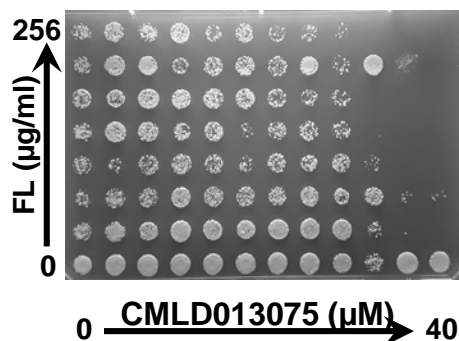

1247 **Supplementary Figure 9**

1248 **Combination with FL generates a fungicidal drug combination. a,** Checkerboard

1249 susceptibility assays were performed using a laboratory strain of *C. albicans* (SN95) growing in  
1250 rich medium (YPD) and incubated at 30 °C for 48 hours. Relative growth inhibition caused by 2-  
1251 fold serial dilutions of the indicated compounds is displayed in heat-map format. Each colored  
1252 box represents the mean of duplicate determinations. Color scale for relative growth is provided  
1253 to right of panel, green: no inhibition to black: complete inhibition. **b,** Following exposure to  
1254 compounds, aliquots of the culture in each well (2 µL) were spotted onto compound-free YPD  
1255 agar and plates incubated at 30 °C for an additional 24 hours before macroscopic imaging on a  
1256 standard flat-bed scanner. The entire experiment consisting of growth in liquid culture followed  
1257 by spotting onto YPD agar was repeated once.

1258

**a** Bioanalytical method performance

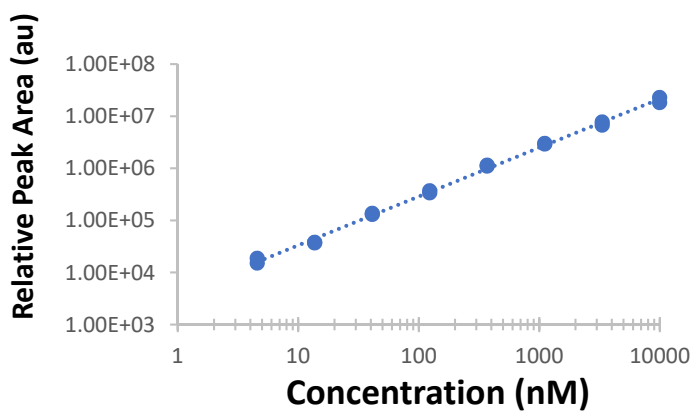

**b**

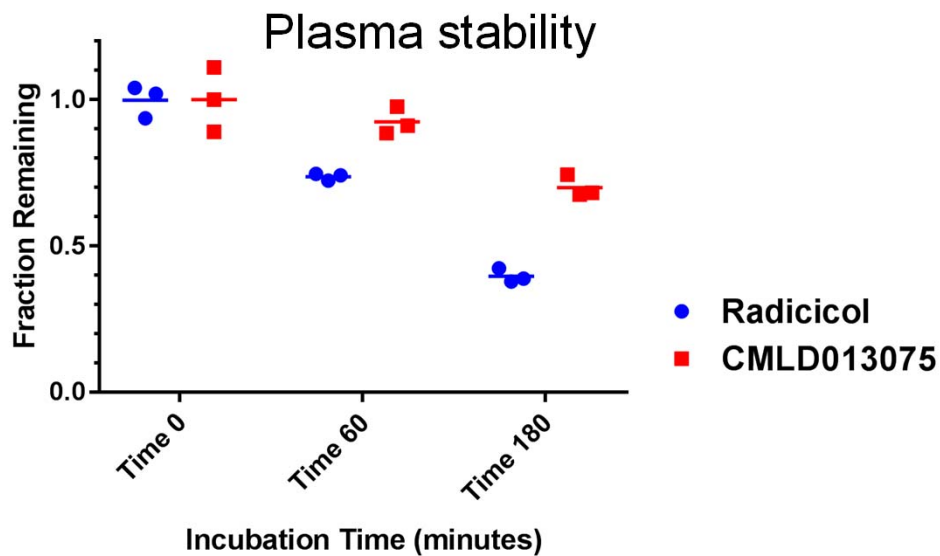

**c**

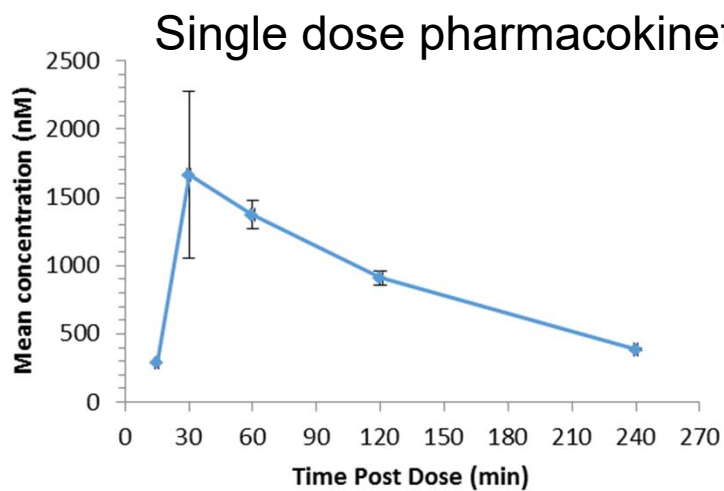

1259 **Supplementary Figure 10**

1260 **Pharmacological properties of CMLD013075. a,** Serial dilution of compound was performed  
1261 in mouse plasma. After extraction into cold acetonitrile spiked with an internal standard  
1262 (imatinib), samples were analyzed by liquid chromatography/ mass spectrometry (LC/MS).  
1263 Duplicate determinations of relative CMLD013075 peak area normalized to internal standard  
1264 were made at each concentration and are plotted against concentration. The method  
1265 demonstrates reliable nanomolar sensitivity and linearity over a 3-log concentration range.  
1266 Independent standard curves were prepared and measured on 3 independent occasions. **b,**  
1267 Stability of compounds upon incubation in mouse plasma at 37 °C for three hours was  
1268 measured using the method described in **a**. The results of 3 independent incubations at each  
1269 time point for each compound is presented. The experiment was performed once. **c,** Single  
1270 dose plasma pharmacokinetic profiling of CMLD013075 was performed in female 129 sv/jae  
1271 mice following subcutaneous administration of compound (40 mg/kg) formulated in cremophor  
1272 vehicle. Plasma was obtained from three mice per time point and compound levels measured  
1273 using the method described in **a**. Mean plasma concentration +/-SD is plotted. The experiment  
1274 was performed once.

1275

# Quality of ligand electron density maps

**ADP complex**

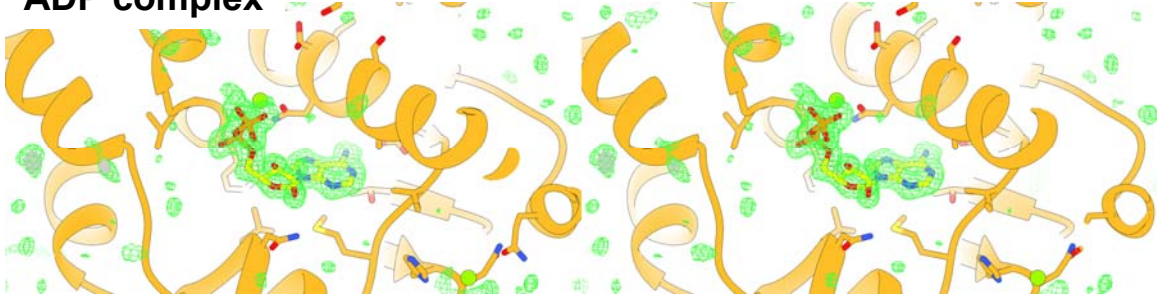

**radicicol complex**

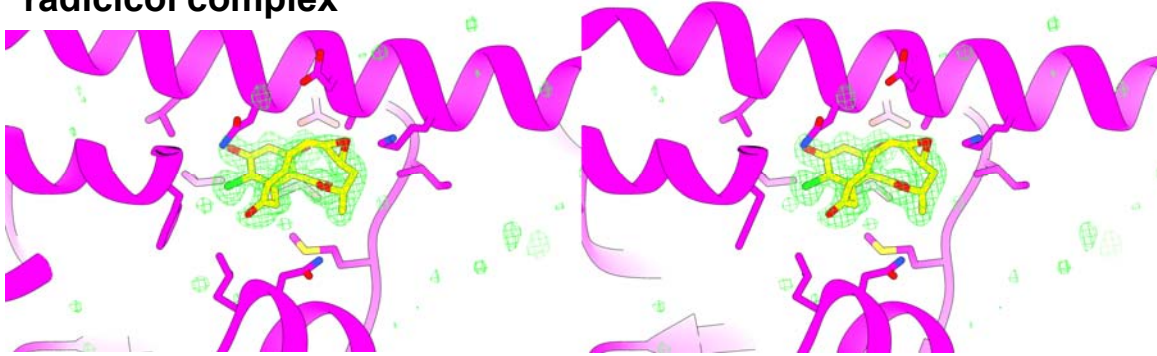

**CMLD013075 complex**

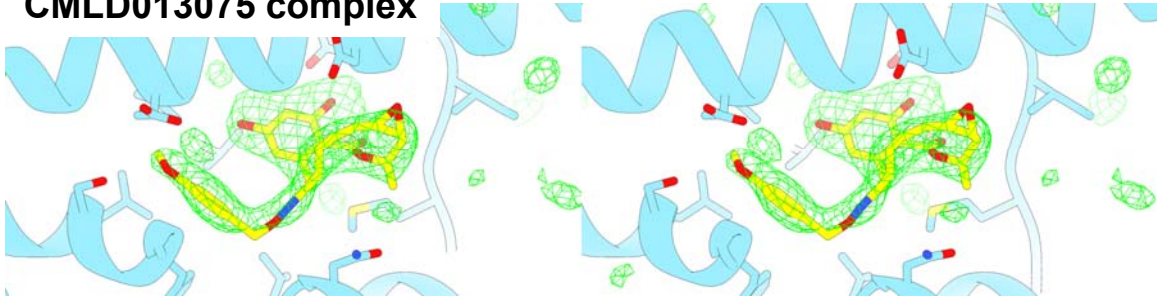

**SNX-2112 complex**

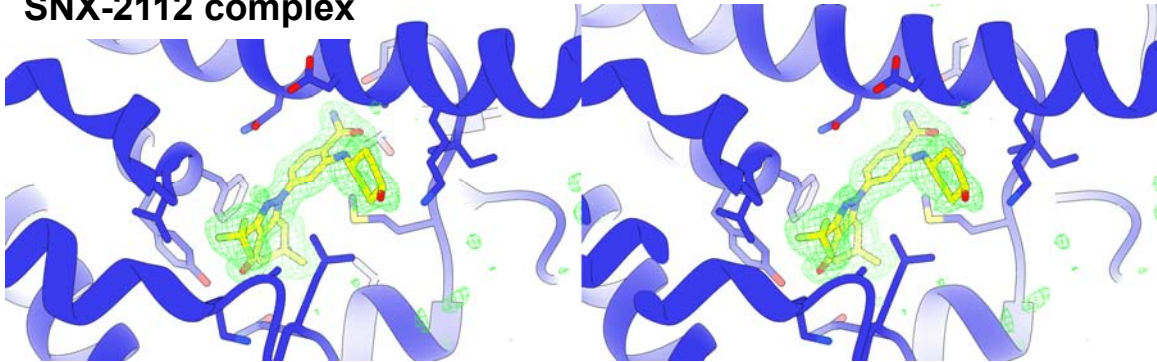

**AUY922 complex**

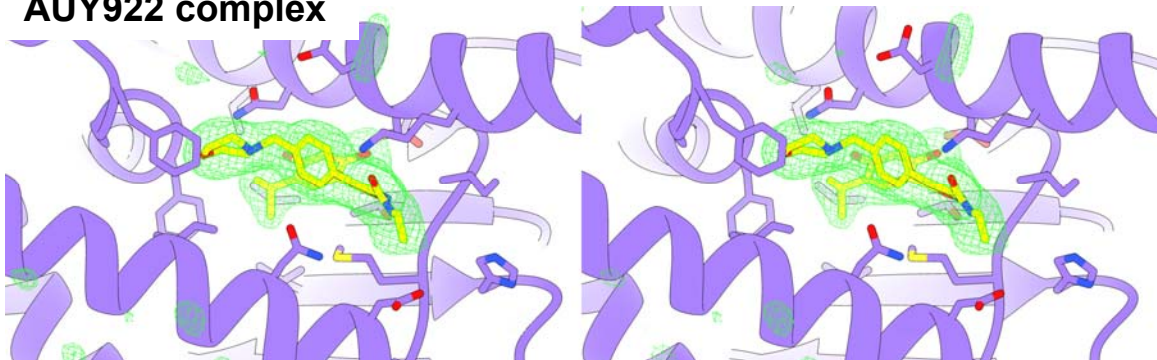

1276 **Supplementary Figure 11**

1277 **Quality of ligand electron density observed for co-crystals.** Stereo diagram of simple  
1278 difference simulating- annealing omit maps for complexes with each of the five compounds  
1279 discussed in the manuscript. The maps are contoured at  $+3\sigma$  and  $-3\sigma$  colored green and red,  
1280 respectively.

1281

**Supplementary Table 1: Crystallographic data and model refinement statistics**

| Ligand             | None ( <i>apo</i> ) |            | ADP            |             | radicol      |             | CMLD013075   |            | SNX-2112     |             | AUY922         |             |
|--------------------|---------------------|------------|----------------|-------------|--------------|-------------|--------------|------------|--------------|-------------|----------------|-------------|
| PDB id             | 6CJI                |            | 6CJJ           |             | 6CJL         |             | 6CJP         |            | 6CJR         |             | 6CJS           |             |
| Space group        | <i>P4(3)22</i>      |            | <i>P4(3)22</i> |             | <i>P4(3)</i> |             | <i>P2(1)</i> |            | <i>P4(3)</i> |             | <i>I4(1)22</i> |             |
| Cell dimensions    |                     |            |                |             |              |             |              |            |              |             |                |             |
| <i>a</i> (Å)       | 73.856              |            | 74.088         |             | 73.116       |             | 40.53        |            | 73.63        |             | 86.21          |             |
| <i>b</i> (Å)       | 73.856              |            | 74.088         |             | 73.116       |             | 80.11        |            | 73.63        |             | 86.21          |             |
| <i>c</i> (Å)       | 107.268             |            | 107.873        |             | 109.499      |             | 78.2         |            | 109.18       |             | 225.85         |             |
| $\alpha$ (°)       | 90                  |            | 90             |             | 90           |             | 90           |            | 90           |             | 90             |             |
| $\beta$ (°)        | 90                  |            | 90             |             | 90           |             | 105.09       |            | 90           |             | 90             |             |
| $\gamma$ (°)       | 90                  |            | 90             |             | 90           |             | 90           |            | 90           |             | 90             |             |
| Resolution (Å)     | 1.64                |            | 1.74           |             | 1.69         |             | 2.6          |            | 1.79         |             | 1.89           |             |
| Source             | In house            |            | In house       |             | CLS          |             | CLS          |            | APS (23-ID)  |             | APS (23-ID)    |             |
| Resolution (Å)     | 50 - 1.64           | 1.6 - 1.64 | 50 - 1.74      | 1.77 - 1.74 | 50 - 1.67    | 1.76 - 1.67 | 55 - 2.60    | 2.74 - 2.6 | 50 - 1.79    | 1.86 - 1.79 | 43.1 - 1.89    | 1.96 - 1.89 |
| R <sub>merge</sub> | 0.069               | 1.058      | 0.076          | 0.988       | 0.1          | 0.517       | 0.054        | 0.173      | 0.078        | 0.767       | 0.081          | 1.85        |
| I/sigI             | 17.5                | 3.6        | 17.1           | 3.8         | 14.6         | 4.7         | 17           | 5.9        | 15.36        | 1.38        | 16.9           | 1.2         |
| Redundancy         | 14.8                | 12.7       | 15.1           | 12.6        | 9.9          | 9.3         | 4.8          | 3.9        | 6.7          | 4.9         | 12.9           | 12.8        |
| Completeness (%)   | 100                 | 100        | 100            | 100         | 99.9         | 99.8        | 96.9         | 86         | 99.08        | 92.81       | 99.9           | 99.6        |
| Reflections        | 37157               | 1826       | 31576          | 1563        | 66682        | 9675        | 14455        | 1855       | 53380        | 4969        | 34601          | 3371        |
| <b>Refinement</b>  |                     |            |                |             |              |             |              |            |              |             |                |             |
| Resolution (Å)     | 31.5 - 1.64         |            | 33.1 - 1.74    |             | 32.7 - 1.69  |             | 39.2 - 2.60  |            | 27.3 - 1.79  |             | 43.1 - 1.90    |             |
| No. reflections    | 37104               |            | 31531          |             | 63255        |             | 14434        |            | 53380        |             | 34578          |             |
| R <sub>work</sub>  | 17.3                |            | 16.97          |             | 14.51        |             | 20.3         |            | 17.26        |             | 16.68          |             |
| R <sub>free</sub>  | 18.75               |            | 19.03          |             | 16.53        |             | 24.6         |            | 22.08        |             | 19.34          |             |
| Atoms              | 2084                |            | 2043           |             | 3810         |             | 3207         |            | 3678         |             | 1936           |             |
| Protein            | 1875                |            | 1783           |             | 3394         |             | 3109         |            | 3358         |             | 1747           |             |
| (a.a.)             | 214                 |            | 214            |             | 426          |             | 399          |            | 420          |             | 218            |             |



|                       |       |       |       |       |       |       |
|-----------------------|-------|-------|-------|-------|-------|-------|
| Ligand/ion            | 28    | 41    | 51    | 68    | 37    | 38    |
| water                 | 181   | 219   | 365   | 30    | 283   | 151   |
| B-factors             | 27.08 | 28.75 | 25.72 | 56.88 | 35.43 | 51.77 |
| Protein               | 25.98 | 27.84 | 24.94 | 57.25 | 35.2  | 51.29 |
| Ligand/ion            | 40.39 | 30.34 | 17.39 | 44.44 | 33.65 | 52.22 |
| water                 | 36.39 | 35.88 | 34.2  | 46.8  | 38.37 | 57.14 |
| Ramachandran plot (%) |       |       |       |       |       |       |
| Favored               | 94.67 | 96.54 | 96.67 | 96.43 | 96.6  | 98.15 |
| Allowed               | 5.33  | 3.46  | 3.33  | 3.57  | 3.16  | 1.85  |
| Outliers              | 0     | 0     | 0     | 0     | 0.24  | 0     |
| RMS bonds             | 0.009 | 0.008 | 0.005 | 0.003 | 0.011 | 0.012 |
| RMS angles            | 1.041 | 1.013 | 1.08  | 0.741 | 1.11  | 1.33  |

**Supplementary Table 2: Superposition r.m.s.d values for apo and ligand-bound structures of *C. albicans* Hsp90**

| <i>r.m.s.d.</i><br>(all atoms Å) | apo         | ADP         | RDC         | CMLD013075  | AUY922      | SNX-2112 |
|----------------------------------|-------------|-------------|-------------|-------------|-------------|----------|
| <i>apo</i>                       | –           |             |             |             |             |          |
| <i>ADP</i>                       | <b>0.75</b> | –           |             |             |             |          |
| <i>radicol</i>                   | <b>1.32</b> | <b>1.09</b> | –           |             |             |          |
| <i>CMLD013075</i>                | <b>2.72</b> | <b>2.71</b> | <b>2.72</b> | –           |             |          |
| <i>AUY922</i>                    | <b>3.47</b> | <b>3.46</b> | <b>3.53</b> | <b>2.35</b> | –           |          |
| <i>SNX-2112</i>                  | <b>1.22</b> | <b>1.08</b> | <b>1.31</b> | <b>2.78</b> | <b>3.41</b> | –        |

**Supplementary Table 3: Relative Hsp90 binding affinity of compounds determined in whole cell lysates by FP assay**

| Compound              | SC5314 EC <sub>50</sub> * | HEPG2 EC <sub>50</sub> * | Selectivity Ratio** |
|-----------------------|---------------------------|--------------------------|---------------------|
| geldanamycin          | 17                        | 22                       | 1.0                 |
| KF58333               | 7                         | 10                       | 1.2                 |
| <b>1</b> (CMLD013075) | 505                       | 3000                     | 4.6                 |
| <b>2</b>              | 392                       | 353                      | 0.7                 |
| <b>3</b>              | 972                       | 2500                     | 2.0                 |
| <b>4</b>              | 531                       | 2000                     | 2.9                 |
| <b>5</b>              | 1348                      | 3000                     | 1.7                 |
| <b>6</b>              | 417                       | 729                      | 1.3                 |
| <b>7</b>              | 360                       | 664                      | 1.4                 |
| <b>8</b>              | 5                         | 8                        | 1.1                 |

\*Concentration (nM) resulting in 50% inhibition of maximal fluorescence polarization signal as determined by 4-parameter curve fit, all fits R<sup>2</sup> >0.99.

\*\*EC<sub>50</sub> HEPG2/EC<sub>50</sub> SC5314 normalized to geldanamycin ratio = 1.0

**Supplementary Table 4: Strains used in this study.**

| Strain           | Genotype                                                                                                       | Source                          |
|------------------|----------------------------------------------------------------------------------------------------------------|---------------------------------|
| CaLC79 (CaCi-2)  | Prototrophic (Clinical Isolate)                                                                                | (White 1997)                    |
| CaLC155 (SC5314) | Prototrophic                                                                                                   | (Odds, Brown et al. 2004)       |
| CaLC239 (SN95)   | <i>arg43Δ/arg4Δhis13Δ/his1Δ3 URA3/ura3Δ3::imm434 IRO1/iro1Δ3::imm434</i>                                       | (Noble and Johnson 2005)        |
| CaLC867          | <i>ENO1/ENO1-GFP-NAT</i>                                                                                       | This study                      |
| CaLC922          | <i>ura3 HSP70::HSP70p-lacZ-URA3</i>                                                                            | This study                      |
| CaLC922          | <i>ura3/ura3 HSP70::HSP70p-lacZ-URA3</i>                                                                       | (Shapiro, Uppuluri et al. 2009) |
| ScLC1963         | As ScLC3048 + pAG424-Hsp90 $\alpha$                                                                            | (Scroggins, Robzyk et al. 2007) |
| ScLC1964         | As ScLC3048 + pAG424-Hsp90 $\beta$                                                                             | (Scroggins, Robzyk et al. 2007) |
| ScLC1965         | As ScLC3048 + pAG424-Hsc82                                                                                     | Received from Lindquist Lab     |
| ScLC3048 (4KO)   | <i>can1-100,his3-11,15,leu2-3,112,trp1-1,ura3-1,ade2-1, hsc82::KANmx,hsp82::kanMx pdr1::KANmx, pdr3::KANmx</i> | Received from Lindquist Lab     |
| ScLC3827         | As ScLC3048, + pAG424-CaHsp90 (pLC868)                                                                         | This study                      |
| ScLC5036         | As ScLC3048, + pAG424-CaHsp90T12Q (pLC1003)                                                                    | This study                      |
| ScLC5037         | As ScLC3048, + pAG424-CaHsp90 L130A F131Y (pLC1004)                                                            | This study                      |
| ScLC5038         | As ScLC3048, + pAG424-CaHsp90 K158S T162R (pLC1004)                                                            | This study                      |

**Supplementary Table 5: Plasmids used in this study.**

| Plasmid Name | Description                                             | Source                      |
|--------------|---------------------------------------------------------|-----------------------------|
| pLC868       | pAG424-CaHsp90                                          | Received from Lindquist Lab |
| pLC1003      | pAG424-CaHsp90 <sup>T12Q</sup>                          | This study                  |
| pLC1004      | pAG424-CaHsp90 <sup>L130A F131Y</sup>                   | This study                  |
| pLC1005      | pAG424-CaHsp90 <sup>K158S T162R</sup>                   | This study                  |
| pET15-MHL    | T7-driven expression of recombinant proteins in E. coli | GenBank Accession EF456738  |

**Supplementary Table 6: Oligonucleotides used in this study.**

| Name           | Description                             | Sequence                                           |
|----------------|-----------------------------------------|----------------------------------------------------|
| <b>oLC11</b>   | <i>ScHSC82-5R</i>                       | CAGCAGATAGAGCTTCCATG                               |
| <b>oLC321</b>  | <i>CaHSP90 + 499F</i>                   | AACGAAAGATTGGGTCGTGG                               |
| <b>oLC322</b>  | <i>CaHSP90 + 1033F</i>                  | GTGTTTATCACTGATGATGC                               |
| <b>oLC323</b>  | <i>CaHSP90 + 1599F</i>                  | AAAAGCTGCTAGAGAAAAGG                               |
| <b>oLC611</b>  | <i>CaHSP90+533R</i>                     | AATCTCAACATGGTACCACG                               |
| <b>oLC755</b>  | <i>HSP90+1040-R</i>                     | AGTGATAAACACTCTACGGACG                             |
| <b>oLC1869</b> | <i>ScURA3+599R</i>                      | ATAATCAACCAATCGTAACC                               |
| <b>oLC3437</b> | <i>Ca HSP90+2001F</i>                   | ATTGATTGCCTTGGGATT                                 |
| <b>oLC3723</b> | pBluescriptKS                           | TCGAGGTCGACGGTATC                                  |
| <b>oLC5120</b> | <i>CaHSP90</i> <sup>T12Q</sup> -F       | GTTGAAACTCACGAATTCAGGCTGAGATCTCTCAGTTGATG          |
| <b>oLC5121</b> | <i>CaHSP90</i> <sup>T12Q</sup> -R       | CATCAACTGAGAGATCTCAGCCTGGAATTCGTGAGTTTCAAC         |
| <b>oLC5122</b> | <i>CaHSP90</i> <sup>L130AF131Y</sup> -F | GGTGTGGTTTCTACTCCGCTACTTGGTTGCTGATCACGTCCAAG       |
| <b>oLC5123</b> | <i>CaHSP90</i> <sup>L130AF131Y</sup> -R | CTTGACGTGATCAGCAACCAAGTACGCGGAGTAGAAACCAACACC      |
| <b>oLC5124</b> | <i>CaHSP90</i> <sup>K158ST162R</sup> -F | GGAATCTAACGCTGGTGGTAGCTTCACTGTTCTGTTGGATGAAACTAACG |
| <b>oLC5125</b> | <i>CaHSP90</i> <sup>K158ST162R</sup> -R | CGTTAGTTTCATCAAACGAACAGTGAAGCTACCACCAGCGTTAGATTCC  |

## Supplementary Methods

### Chemistry: General Methods

$^1\text{H}$  NMR spectra were recorded at 400 MHz or 500 MHz at ambient temperature with acetone- $\text{d}_6$  as the solvent unless otherwise stated.  $^{13}\text{C}$  NMR spectra were recorded at 100 MHz or 125 MHz at ambient temperature with acetone- $\text{d}_6$  as the solvent unless otherwise stated. Chemical shifts are reported in parts per million. Data for  $^1\text{H}$  NMR are reported as follows: chemical shift, multiplicity (app = apparent, br = broad, s = singlet, d = doublet, t = triplet, q = quartet, m = multiplet) coupling constants and integration. All  $^{13}\text{C}$  NMR spectra were recorded with complete proton decoupling. High resolution mass spectra were obtained in the Boston University Chemical Instrumentation Center using a Waters Q-TOF mass spectrometer. Analytical thin layer chromatography was performed using 0.25 mm silica gel 60-F plates. Flash chromatography was performed using 200-400 mesh silica gel (Sorbent Technologies, Inc.) or pre-pack column (SI-HC, puriFlash®) by Interchim puriFlash®450 or Yamazen Smart Flash EPCLC W-Prep2XY system. Yields refer to chromatographically and spectroscopically pure compounds, unless otherwise stated. All reactions were carried out in oven-dried glassware under an argon atmosphere unless otherwise noted. Analytical LC-MS experiments were performed using a Waters Acquity UPLC (Ultra Performance Liquid Chromatography) with a Binary solvent manager, SQ mass spectrometer, Waters 2996 PDA (Photo Diode Array) detector, and Evaporative Light Scattering Detector (ELSD).

## Structures and general procedure for the synthesis of oximes 1-8:

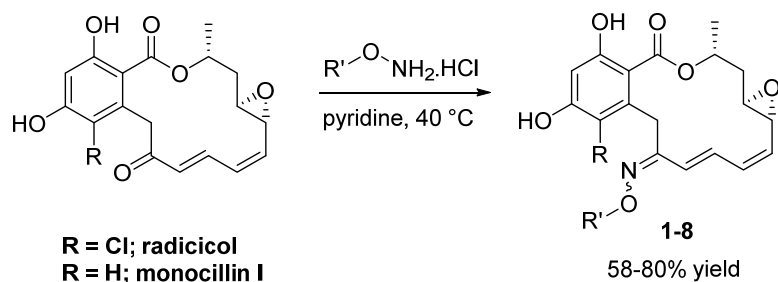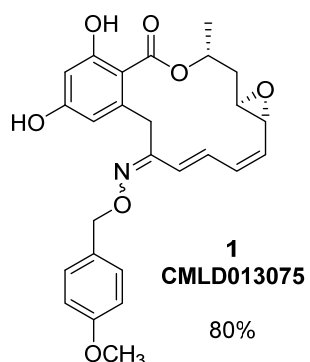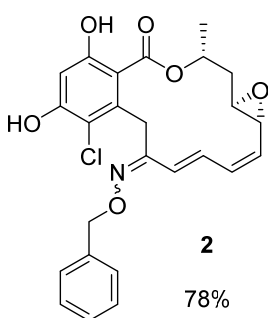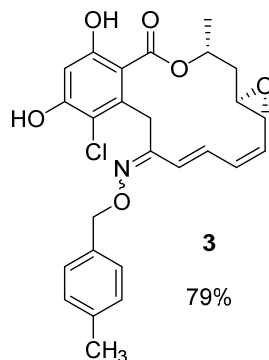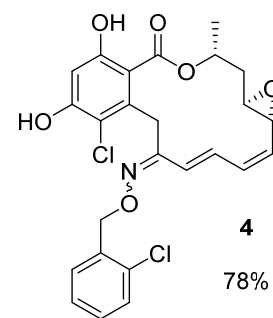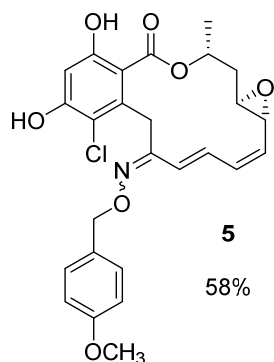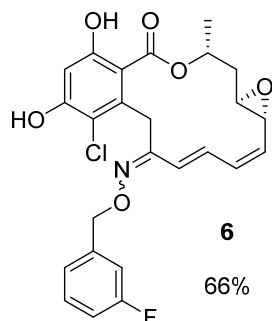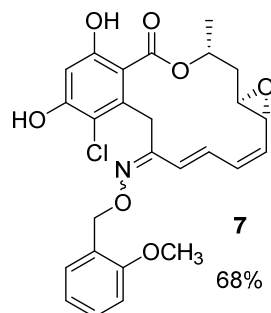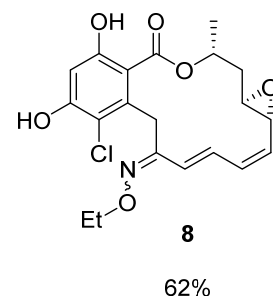

To a solution of monocillin I or radicicol in anhydrous pyridine (0.15 M) was added the appropriate hydroxylamine hydrochloride salt (2.5 equivalents). The reaction was then stirred at 40 °C until TLC indicated full consumption of starting material (generally 5-6 hours). The reaction was then allowed to cool to room temperature and diluted with ethyl acetate (10 volume equivalents). Water (1 volume equivalent) is added and the layers are shaken vigorously. The biphasic mixture is then loaded onto a Hydromatrix cartridge of appropriate size to capture the volume of water added and left to sit for 20 minutes. The cartridge was then eluted with approximately 20 volume equivalents

of ethyl acetate. The eluent was concentrated, re-dissolved in a minimal amount of dichloromethane plus 10 mL of heptane and re-concentrated to remove pyridine. This process was repeated three times. The crude residue was purified *via* flash column chromatography using a gradient of acetone in dichloromethane. In the cases where this purification was insufficient, a second column was run using a gradient of ethyl acetate in hexanes to remove remaining impurities.

**Full characterization data for oximes 1-8:**

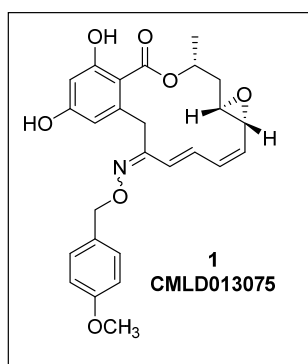

**1a*R*,2*Z*,4*E*,14*R*,15a*S*)-9,11-dihydroxy-6-(((4-methoxybenzyl)oxy)imino)-14-methyl-1a,6,7,14,15,15a-hexahydro-12*H*-benzo[*c*]oxireno[2,3-*k*][1]oxacyclotetradecin-12-one (1, CMLD013075).** Obtained from reaction of monocillin I and 1-[(ammoniooxy)methyl]-3-fluorobenzenechloride according to the General Procedure (80% yield, 3:1 ratio of *E:Z* isomers) after one

column, 1% to 5% acetone in dichloromethane.

<sup>1</sup>H NMR (*E*)-isomer: (400 MHz, Acetone-*d*<sub>6</sub>) δ 10.96 (s, 1H), 9.16 (s, 1H), 7.47 – 7.33 (m, 3H), 7.01 – 6.88 (m, 2H), 6.82 (d, *J* = 15.9 Hz, 1H), 6.49 (dd, *J* = 2.5, 1.0 Hz, 1H), 6.34 – 6.19 (m, 2H), 5.67 (dd, *J* = 10.4, 3.2 Hz, 1H), 5.62 – 5.46 (m, 1H), 5.22 – 5.08 (m, 2H), 4.72 (d, *J* = 15.2 Hz, 1H), 3.80 (s, 3H), 3.46 (d, *J* = 15.2 Hz, 1H), 3.23 (dt, *J* = 3.6, 1.9 Hz, 1H), 3.09 (dt, *J* = 9.3, 2.6 Hz, 1H), 2.44 (dq, *J* = 14.8, 2.7, 2.0 Hz, 1H), 1.80 (ddd, *J* = 14.5, 11.0, 3.9 Hz, 1H), 1.63 (d, *J* = 6.9 Hz, 3H).

<sup>1</sup>H NMR (*Z*)-isomer: (400 MHz, Acetone-*d*<sub>6</sub>) δ 10.96 (s, 1H), 9.16 (s, 1H), 7.52 – 7.22 (m, 2H), 7.02 – 6.88 (m, 2H), 6.39 – 6.05 (m, 2H), 5.54 (tq, *J* = 6.7, 3.3 Hz, 2H), 5.16 (dd, *J* = 11.3, 2.2 Hz, 2H), 4.40 (d, *J* = 14.7 Hz, 1H), 4.32 (s, 1H), 3.79 (s, 3H), 3.23 (dt, *J* = 3.7, 1.8 Hz, 1H), 3.08 (ddt, *J* = 7.2, 4.6, 2.6 Hz, 1H), 2.44 (dq, *J* = 14.8, 2.7, 2.1 Hz, 1H), 1.95 – 1.71 (m, 1H), 1.61 (d, *J* = 7.9 Hz, 3H).

$^{13}\text{C}$  NMR (mixture of *E* and *Z* isomers): (101 MHz, Acetone- $d_6$ )  $\delta$  170.6, 165.0, 162.8, 160.5, 160.4, 159.2, 156.0, 143.5, 142.2, 134.4, 133.4, 131.9, 131.6, 130.9, 130.8, 130.7, 130.4, 129.8, 120.8, 114.5, 110.2, 110.0, 106.4, 102.5, 102.3, 76.7, 76.6, 71.7, 56.0, 55.9, 55.9, 55.5, 37.1, 37.1, 34.5, 18.7. UPLC-MS calc  $m/z$  [ $\text{C}_{26}\text{H}_{27}\text{O}_7\text{N}+\text{H}$ ] $^+$ : 466.1866, found: 466.147

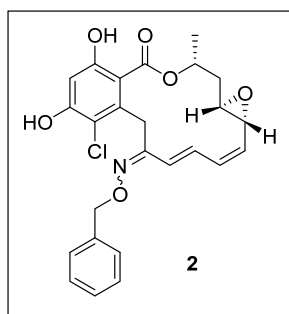

**(1aR,2Z,4E,14R,15aS)-6-((benzyloxy)imino)-8-chloro-9,11-dihydroxy-14-methyl-1a,6,7,14,15,15a-hexahydro-12H-benzo[c]oxireno[2,3-k][1]oxacyclotetradecin-12-one (2).** Obtained from reaction of radicicol and *O*-benzylhydroxylamine hydrochloride according to the General Procedure (78% yield, 1:2.2 ratio of *E*:*Z* isomers)

after one column, 1% to 4% acetone in dichloromethane.  $^1\text{H}$  NMR and  $^{13}\text{C}$  NMR resonances matched previously reported chemical shifts (Shinonaga, Noguchi et al. 2009).

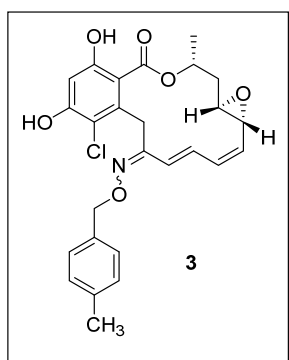

**(1aR,2Z,4E,14R,15aS)-8-chloro-9,11-dihydroxy-14-methyl-6-(((4-methylbenzyl)oxy)imino)-1a,6,7,14,15,15a-hexahydro-12H-benzo[c]oxireno[2,3-k][1]oxacyclotetradecin-12-one (3).** Obtained from reaction of radicicol and 1-[(ammoniooxy)methyl]-4-methylbenzene chloride according to the General Procedure (79% yield, 1:1.6 ratio of

*E*:*Z* isomers) after one column, 1% to 3% acetone in dichloromethane.

$^1\text{H}$  NMR (*E*)-isomer: (500 MHz, Acetone- $d_6$ )  $\delta$  9.49 (s, 1H), 7.34 (d,  $J = 7.8$  Hz, 2H), 7.19 – 7.17 (m, 2H), 7.15 – 7.09 (m, 1H), 6.77 (d,  $J = 16.1$  Hz, 1H), 6.54 (s, 1H), 6.25 – 6.09 (m, 2H), 5.48 (dd,  $J = 10.5, 3.4$  Hz, 1H), 5.36 (qt,  $J = 6.7, 3.8$  Hz, 1H), 5.18 (s, 2H), 4.65 (d,  $J = 16.3$  Hz, 1H), 3.75 (d,  $J = 16.4$  Hz, 1H), 3.24 – 3.14 (m, 1H), 2.95 (ddd,  $J = 9.4, 3.4, 2.2$  Hz, 1H), 2.49 – 2.39 (m, 1H), 2.32 (s, 3H), 1.70 – 1.59 (m, 1H), 1.54 (d,  $J = 6.6$  Hz, 3H).

$^1\text{H}$  NMR (*Z*)-isomer: (500 MHz, Acetone- $d_6$ )  $\delta$  9.49 (s, 1H), 7.30 (d,  $J = 7.8$  Hz, 2H), 7.27 – 7.21 (m, 2H), 7.20 – 7.15 (m, 2H), 6.77 (d,  $J = 16.1$  Hz, 1H), 6.54 (d,  $J = 1.9$  Hz, 1H), 6.25 – 6.09 (m,

1H), 5.58 (dd,  $J = 10.6, 3.7$  Hz, 1H), 5.36 (qt,  $J = 6.7, 3.8$  Hz, 1H), 5.18 – 5.08 (m, 2H), 4.12 (d,  $J = 16.0$  Hz, 1H), 4.04 – 3.96 (m, 1H), 3.30 (dt,  $J = 3.7, 1.9$  Hz, 0H), 3.02 (ddd,  $J = 8.7, 3.7, 2.2$  Hz, 1H), 2.49 – 2.39 (m, 1H), 2.32 (s, 3H), 1.66 (ddd,  $J = 15.0, 8.8, 4.2$  Hz, 1H), 1.56 (d,  $J = 6.6$  Hz, 3H).

$^{13}\text{C}$  NMR (mixture of *E* and *Z* isomers): (101 MHz, Acetone- $d_6$ )  $\delta$  168.3, 168.1, 158.4, 158.1, 157.1, 157.0, 155.2, 154.2, 138.2, 138.0, 137.0, 136.6, 136.3, 135.8, 132.9, 132.8, 132.2, 132.0, 131.4, 130.5, 130.1, 129.7, 129.6, 129.5, 129.3, 129.0, 127.4, 121.8, 115.2, 114.0, 113.8, 103.5, 103.3, 76.9, 76.6, 71.9, 56.1, 55.9, 55.7, 37.4, 35.8, 28.7, 21.2, 18.7, 18.4.

HRMS calc  $m/z$  [ $\text{C}_{26}\text{H}_{26}\text{O}_6\text{NCl}+\text{H}$ ] $^+$ : 484.1527, found 484.1510.

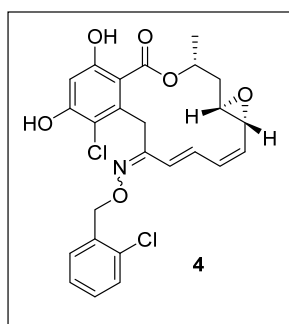

**(1a*R*,2*Z*,4*E*,14*R*,15a*S*)-8-chloro-6-(((2-chlorobenzyl)oxy)imino)-9,11-dihydroxy-14-methyl-1a,6,7,14,15,15a-hexahydro-12*H*-**

**benzo[*c*]oxireno[2,3-*k*][1]oxacyclotetradecin-12-one (4).** Obtained from reaction of radicicol and 1-[(ammoniooxy)methyl]-4-methylbenzene chloride according to the General Procedure (78% yield, 1:4.3 ratio of

*E*:*Z* isomers) after one column, 1% to 3% acetone in dichloromethane.

$^1\text{H}$  NMR (*E*-isomer): (400 MHz, Acetone- $d_6$ )  $\delta$  7.60 (dd,  $J = 5.7, 3.7$  Hz, 1H), 7.46 – 7.40 (m, 1H), 7.35 (td,  $J = 6.1, 3.4$  Hz, 2H), 7.22 – 7.08 (m, 1H), 6.55 (s, 1H), 6.29 – 6.06 (m, 2H), 5.49 (dd,  $J = 10.6, 3.4$  Hz, 1H), 5.40 – 5.32 (m, 3H), 4.68 (d,  $J = 16.4$  Hz, 1H), 3.80 (d,  $J = 16.5$  Hz, 1H), 3.25 – 3.19 (m, 1H), 2.98 – 2.92 (m, 1H), 2.45 (ddt,  $J = 13.7, 9.8, 3.5$  Hz, 1H), 1.65 (dq,  $J = 13.7, 4.6$  Hz, 1H), 1.56 (d,  $J = 7.3$  Hz, 3H).

$^1\text{H}$  NMR (*Z*-isomer): (400 MHz, Acetone- $d_6$ )  $\delta$  7.54 (dd,  $J = 5.8, 3.6$  Hz, 1H), 7.48 – 7.41 (m, 1H), 7.35 (td,  $J = 6.1, 3.4$  Hz, 2H), 7.29 (dd,  $J = 16.1, 11.2$  Hz, 1H), 6.84 (d,  $J = 16.2$  Hz, 1H), 6.55 (s, 1H), 6.32 – 6.08 (m, 1H), 5.61 (dd,  $J = 10.5, 3.7$  Hz, 1H), 5.40 – 5.35 (m, 1H), 5.29 (d,  $J = 1.8$  Hz, 2H), 4.13 (d,  $J = 16.1$  Hz, 1H), 3.99 (d,  $J = 16.1$  Hz, 1H), 3.31 (d,  $J = 3.6$  Hz, 1H), 3.04



(dt,  $J = 8.5, 3.2$  Hz, 1H), 2.45 (ddt,  $J = 13.7, 9.8, 3.5$  Hz, 1H), 1.66 (ddt,  $J = 13.7, 8.9, 4.4$  Hz, 1H), 1.57 (d,  $J = 6.8$  Hz, 3H).

$^{13}\text{C}$  NMR (mixture of *E* and *Z* isomers): (101 MHz, Acetone- $d_6$ )  $\delta$  168.3, 168.1, 158.6, 158.2, 157.1, 157.1, 156.1, 155.1, 137.0, 136.9, 136.5, 136.3, 134.0, 133.5, 133.3, 133.2, 132.1, 131.9, 131.8, 131.3, 130.9, 130.8, 130.3, 130.1, 130.0, 129.7, 127.8, 127.7, 121.6, 115.2, 114.3, 113.9, 113.7, 103.5, 103.4, 74.0, 73.7, 73.6, 73.6, 72.1, 71.9, 56.1, 55.9, 55.6, 37.4, 35.7, 28.9, 18.7, 18.4.

HRMS calc  $m/z$  [ $\text{C}_{25}\text{H}_{23}\text{O}_6\text{NCl}_2 + \text{H}$ ] $^+$ : 504.0981, found 504.0996.

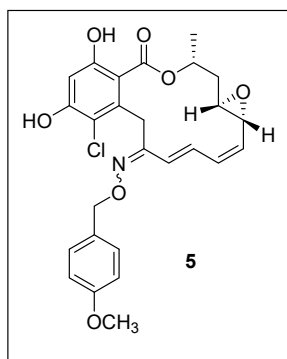

**(1aR,2Z,4E,14R,15aS)-8-chloro-9,11-dihydroxy-6-(((4-methoxybenzyl)oxy)imino)-14-methyl-1a,6,7,14,15,15a-hexahydro-12H-benzo[c]oxireno[2,3-k][1]oxacyclotetradecin-12-one (5).**

Obtained from reaction of radicicol and 1-[(ammoniooxy)methyl]-3-fluorobenzenechloride according to the General Procedure (58% yield, 1:2.4 ratio of *E*:*Z* isomers) after one column, 2% acetone in

dichloromethane.

$^1\text{H}$  NMR (*E*)-isomer: (400 MHz, Acetone- $d_6$ )  $\delta$  9.51 (s, 1H), 7.44 – 7.30 (m, 2H), 7.15 (dd,  $J = 16.2, 11.1$  Hz, 1H), 6.98 – 6.86 (m, 2H), 6.54 (s, 1H), 6.24 – 6.04 (m, 2H), 5.52 – 5.42 (m, 1H), 5.41 – 5.30 (m, 1H), 5.15 (s, 2H), 4.63 (d,  $J = 16.3$  Hz, 1H), 3.80 (d,  $J = 1.5$  Hz, 3H), 3.72 (d,  $J = 16.4$  Hz, 1H), 3.23 (d,  $J = 3.0$  Hz, 1H), 2.98 – 2.91 (m, 1H), 2.45 (dq,  $J = 12.6, 4.2$  Hz, 1H), 1.70 – 1.60 (m, 1H), 1.54 (d,  $J = 8.8$  Hz, 3H).

$^1\text{H}$  NMR (*Z*)-isomer: (400 MHz, Acetone- $d_6$ )  $\delta$  9.51 (s, 1H), 7.46 – 7.28 (m, 2H), 7.24 (dd,  $J = 16.2, 11.2$  Hz, 1H), 6.97 – 6.83 (m, 2H), 6.75 (d,  $J = 16.2$  Hz, 1H), 6.54 (s, 1H), 6.32 – 6.08 (m, 1H), 5.58 (dd,  $J = 10.7, 3.6$  Hz, 1H), 5.36 (tt,  $J = 7.1, 3.8$  Hz, 1H), 5.15 – 5.03 (m, 2H), 4.11 (d,  $J = 16.0$  Hz, 1H), 4.00 (d,  $J = 16.4$  Hz, 1H), 3.80 (s, 3H), 3.32 – 3.26 (m, 1H), 3.07 – 2.99 (m, 1H), 2.45 (dq,  $J = 12.6, 4.2$  Hz, 1H), 1.71 – 1.60 (m, 1H), 1.56 (d,  $J = 6.1$  Hz, 3H).

<sup>13</sup>C NMR (mixture of *E* and *Z* isomers): (101 MHz, Acetone-*d*<sub>6</sub>) δ 168.3, 168.1, 160.4, 160.3, 158.4, 158.1, 157.0, 157.0, 155.1, 154.1, 137.0, 136.6, 132.8, 132.8, 132.2, 132.1, 131.4, 131.2, 130.9, 130.7, 130.5, 130.2, 121.9, 115.2, 114.4, 114.4, 114.0, 113.9, 103.5, 103.3, 76.8, 76.4, 72.0, 71.9, 71.9, 56.1, 55.9, 55.7, 55.5, 55.5, 37.4, 35.8, 28.7, 18.7, 18.4.

HRMS calc *m/z* [C<sub>26</sub>H<sub>26</sub>O<sub>7</sub>NCl+H]<sup>+</sup>: 500.1476, found 500.1490.

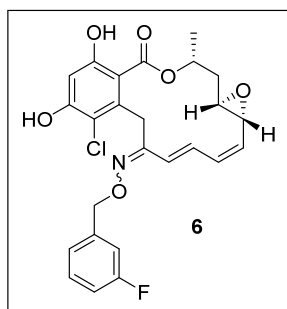

**(1aR,2Z,4E,14R,15aS)-8-chloro-6-(((3-fluorobenzyl)oxy)imino)-9,11-dihydroxy-14-methyl-1a,6,7,14,15,15a-hexahydro-12H-benzo[c]oxireno[2,3-*k*][1]oxacyclotetradecin-12-one (6).** Obtained

from reaction of radicicol and 1-[(ammoniooxy)methyl]-3-

fluorobenzenechloride according to the General Procedure (66% yield,

1:2.9 ratio of *E*:*Z* isomers) after one column, 1% to 3% acetone in dichloromethane.

<sup>1</sup>H NMR (*E*-isomer): (400 MHz, Acetone-*d*<sub>6</sub>) δ 7.40 (td, *J* = 7.7, 6.0 Hz, 1H), 7.33 – 7.14 (m, 3H), 7.11 – 7.01 (m, 1H), 6.54 (s, 1H), 6.32 – 6.09 (m, 2H), 5.49 (dd, *J* = 10.5, 3.3 Hz, 1H), 5.36 (td, *J* = 6.9, 3.5 Hz, 1H), 5.25 (s, 2H), 4.67 (d, *J* = 16.4 Hz, 1H), 3.79 (d, *J* = 16.4 Hz, 1H), 3.22 (d, *J* = 3.8 Hz, 1H), 2.99 – 2.93 (m, 1H), 2.46 (ddt, *J* = 14.4, 10.7, 3.5 Hz, 1H), 1.65 (ddd, *J* = 17.3, 8.3, 4.1 Hz, 1H), 1.55 (d, *J* = 7.6 Hz, 3H).

<sup>1</sup>H NMR (*Z*-isomer): (400 MHz, Acetone-*d*<sub>6</sub>) δ 7.46 – 7.35 (m, 1H), 7.32 – 7.15 (m, 3H), 7.12 – 6.96 (m, 1H), 6.82 (d, *J* = 16.2 Hz, 1H), 6.54 (s, 1H), 6.31 – 6.08 (m, 1H), 5.61 (dd, *J* = 10.7, 3.8 Hz, 1H), 5.36 (td, *J* = 6.9, 3.5 Hz, 1H), 5.20 (s, 2H), 4.12 (d, *J* = 16.1 Hz, 1H), 3.99 (d, *J* = 16.1 Hz, 1H), 3.30 (d, *J* = 3.6 Hz, 1H), 3.08 – 3.00 (m, 1H), 2.46 (ddt, *J* = 14.4, 10.7, 3.5 Hz, 1H), 1.65 (ddd, *J* = 17.3, 8.3, 4.1 Hz, 1H), 1.57 (d, *J* = 6.9 Hz, 3H).

<sup>19</sup>F NMR (mixture of *E* and *Z* isomers): (376 MHz, Acetone-*d*<sub>6</sub>) δ -114.94 – -115.07 (m).

<sup>13</sup>C NMR (mixture of *E* and *Z* isomers): (101 MHz, Acetone-*d*<sub>6</sub>) δ 168.3, 168.1, 164.8, 162.4, 158.5, 158.2, 157.1, 157.1, 155.9, 154.9, 142.7, 142.6, 142.0, 141.9, 136.9, 136.5, 133.3, 133.2, 132.1, 132.0, 131.8, 131.0, 130.9, 130.9, 130.8, 129.8, 124.7, 124.7, 124.4, 124.4, 121.7, 115.6,

115.4, 115.3, 115.3, 115.1, 115.1, 114.9, 114.2, 114.0, 113.8, 103.5, 103.4, 103.4, 76.0, 75.6, 75.6, 72.1, 71.9, 70.2, 56.1, 55.9, 55.7, 37.4, 35.7, 28.8, 18.7, 18.4.

HRMS calc  $m/z$  [ $C_{25}H_{23}O_6NCIF+H$ ]<sup>+</sup>: 488.1276, found 488.1289.

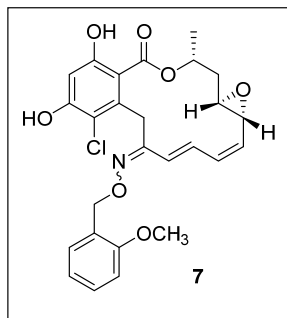

**(1aR,2Z,4E,14R,15aS)-8-chloro-9,11-dihydroxy-6-(((2-methoxybenzyl)oxy)imino)-14-methyl-1a,6,7,14,15,15a-hexahydro-12H-benzo[c]oxireno[2,3-k][1]oxacyclotetradecin-12-one (7).**

Obtained from reaction of radicicol and 1-[(ammoniooxy)methyl]-2-methoxybenzene chloride according to the General Procedure (68%

yield, 1:3 ratio of *E*:*Z* isomers) after one column, 1% to 3% acetone in dichloromethane.

<sup>1</sup>H NMR (*E*-isomer): (400 MHz, Acetone-*d*<sub>6</sub>) δ 7.47 – 7.34 (m, 1H), 7.32 – 7.19 (m, 2H), 7.15 (dd, *J* = 16.2, 11.1 Hz, 0H), 7.06 – 6.88 (m, 2H), 6.54 (d, *J* = 2.4 Hz, 1H), 6.27 – 6.06 (m, 2H), 5.48 (dd, *J* = 10.3, 3.4 Hz, 1H), 5.36 (dt, *J* = 7.1, 3.8 Hz, 1H), 5.25 (d, *J* = 9.8 Hz, 2H), 4.67 (d, *J* = 16.4 Hz, 1H), 3.86 (s, 3H), 3.76 (d, *J* = 16.2 Hz, 1H), 3.23 (s, 1H), 2.96 (d, *J* = 9.0 Hz, 1H), 2.52 – 2.37 (m, 1H), 1.72 – 1.62 (m, 1H), 1.56 (d, *J* = 7.3 Hz, 3H).

<sup>1</sup>H NMR (*Z*-isomer): (400 MHz, Acetone-*d*<sub>6</sub>) δ 7.38 (dd, *J* = 7.6, 1.6 Hz, 1H), 7.31 – 7.19 (m, 2H), 7.04 – 6.88 (m, 2H), 6.82 (d, *J* = 16.2 Hz, 1H), 6.54 (d, *J* = 2.4 Hz, 1H), 6.27 – 6.07 (m, 1H), 5.65 – 5.55 (m, 1H), 5.36 (dt, *J* = 7.1, 3.8 Hz, 1H), 5.21 (s, 2H), 4.12 (d, *J* = 16.0 Hz, 1H), 3.99 (d, *J* = 16.1 Hz, 1H), 3.86 (s, 3H), 3.31 (d, *J* = 3.4 Hz, 1H), 3.10 – 2.99 (m, 1H), 2.51 – 2.38 (m, 1H), 1.72 – 1.60 (m, 1H), 1.57 (d, *J* = 6.8 Hz, 3H).

<sup>13</sup>C NMR (mixture of *E* and *Z* isomers): (101 MHz, Acetone-*d*<sub>6</sub>) δ 168.4, 168.1, 158.5, 158.3, 158.1, 158.0, 157.1, 157.0, 155.2, 154.3, 137.1, 136.6, 132.9, 132.2, 132.1, 131.3, 130.5, 130.4, 130.1, 130.0, 129.9, 129.6, 127.4, 126.7, 121.9, 121.0, 120.9, 115.2, 114.3, 114.1, 113.8, 111.3, 111.2, 103.5, 103.5, 103.3, 72.0, 72.0, 71.9, 71.6, 71.6, 56.1, 56.0, 55.8, 55.7, 55.7, 55.7, 37.4, 35.8, 28.8, 18.7, 18.4.

HRMS calc  $m/z$  [ $C_{26}H_{26}O_7NCl+H$ ]<sup>+</sup>: 500.1476, found 500.1498.

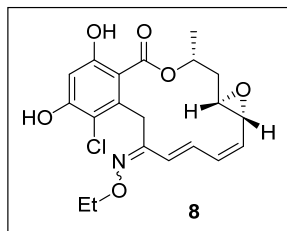

**(1aR,2Z,4E,14R,15aS)-8-chloro-6-(ethoxyimino)-9,11-dihydroxy-14-methyl-1a,6,7,14,15,15a-hexahydro-12H-benzo[c]oxireno[2,3-k][1]oxacyclotetradecin-12-one (8).** Obtained from reaction of radicicol and O-ethylhydroxylamine hydrochloride according to the General

Procedure (62% yield, 1:2.8 ratio of *E*:*Z* isomers) after two columns (1% to 5% acetone in dichloromethane, followed by 20% to 50% ethyl acetate in hexanes).

<sup>1</sup>H NMR (*E*-isomer): (400 MHz, Acetone-*d*<sub>6</sub>) δ 9.53 (s, 1H), 7.14 (dd, *J* = 16.1, 11.1 Hz, 1H), 6.55 (s, 1H), 6.29 – 6.07 (m, 2H), 5.47 (dd, *J* = 10.5, 3.5 Hz, 1H), 5.36 (dq, *J* = 7.2, 4.2, 3.6 Hz, 1H), 4.62 (d, *J* = 16.3 Hz, 1H), 4.22 (q, *J* = 7.1 Hz, 2H), 3.68 (d, *J* = 16.3 Hz, 1H), 3.26 – 3.19 (m, 1H), 3.06 – 2.98 (m, 1H), 2.56 – 2.32 (m, 1H), 1.77 – 1.59 (m, 1H), 1.55 (d, *J* = 6.2 Hz, 3H), 1.36 – 1.10 (m, 3H).

<sup>1</sup>H NMR (*Z*-isomer): (400 MHz, Acetone-*d*<sub>6</sub>) δ 9.53 (s, 1H), 7.24 (dd, *J* = 16.2, 11.3 Hz, 1H), 6.73 (d, *J* = 16.2 Hz, 1H), 6.55 (s, 1H), 6.29 – 6.07 (m, 1H), 5.58 (dd, *J* = 10.5, 3.7 Hz, 1H), 5.36 (dq, *J* = 7.2, 4.2, 3.6 Hz, 1H), 4.15 (qd, *J* = 7.0, 1.1 Hz, 2H), 4.09 (d, *J* = 16.0 Hz, 1H), 4.01 (d, *J* = 16.1 Hz, 1H), 3.31 (dt, *J* = 3.9, 1.9 Hz, 1H), 3.06 – 2.98 (m, 1H), 2.56 – 2.32 (m, 1H), 1.77 – 1.59 (m, 1H), 1.57 (d, *J* = 6.4 Hz, 3H), 1.36 – 1.10 (m, 3H).

<sup>13</sup>C NMR (mixture of *E* and *Z* isomers): (101 MHz, Acetone-*d*<sub>6</sub>) δ 168.3, 168.0, 158.2, 158.0, 157.0, 156.9, 154.6, 153.5, 137.0, 136.7, 132.7, 132.5, 132.2, 132.1, 131.0, 130.4, 121.9, 115.0, 114.2, 114.1, 103.5, 103.3, 72.0, 71.9, 70.4, 70.1, 60.5, 56.1, 56.0, 55.7, 37.5, 37.4, 35.8, 28.5, 20.8, 18.7, 18.4, 15.3, 15.1, 14.5.

HRMS calc *m/z* [C<sub>20</sub>H<sub>22</sub>O<sub>6</sub>NCI]<sup>+</sup>: 408.1214, found 408.1210.

### Oxime Stereochemistry

Oximes were isolated and assayed as mixtures of *E/Z* isomers. While these isomers could be enriched (and in some cases, fully resolved) chromatographically, long-term NMR and LC/MS



## Yeast Strain Construction

**ScLC3827:** To express wild type *C. albicans HSP90* in *S. cerevisiae*, plasmid pLC868 (pAG424-*C. albicans HSP90*) was transformed into ScLC3048 and transformants were selected on YNB supplemented with leucine, tryptophan, and adenine. The presence of pLC868 was verified by PCR using oLC3723 and 3441. Subsequently,  $\sim 10^7$  cells were plated on 0.1% 5-FOA YPD agar plates to counter-select for the pKAT6 vector. An absence of pKAT6 was verified by PCR with oLC11 and oLC1869. Colonies were also verified for the correct auxotrophy by patching on YNB supplemented with leucine, tryptophan, adenine, and uracil as well as by a lack of growth on plates lacking uracil.

**ScLC5036:** To express *C. albicans HSP90*<sup>T12Q</sup> in *S. cerevisiae*, plasmid pLC1003 (pAG424-*C. albicans HSP90*<sup>T12Q</sup>) was transformed into ScLC3048 and transformants were selected on YNB supplemented with leucine, tryptophan, and adenine. The presence of pLC1003 was verified by PCR using oLC3723 and 3441. Subsequently,  $\sim 10^7$  cells were plated on 0.1% 5-FOA YPD agar plates to counter-select for the pKAT6 vector. An absence of pKAT6 was verified by PCR with oLC11 and oLC1869. Colonies were also verified for the correct auxotrophy by patching on YNB supplemented with leucine, tryptophan, adenine, and uracil as well as by a lack of growth on plates lacking uracil.

**ScLC5037:** To express *C. albicans HSP90*<sup>L130AF131Y</sup> in *S. cerevisiae*, plasmid pLC1004 (pAG424-*C. albicans HSP90*<sup>L130AF131Y</sup>) was transformed into ScLC3048 and transformants were selected on YNB supplemented with leucine, tryptophan, and adenine. The presence of pLC1004 was verified by PCR using oLC3723 and 3441. Subsequently,  $\sim 10^7$  cells were plated on 0.1% 5-FOA YPD agar plates to counter-select for the pKAT6 vector. An absence of pKAT6 was verified by PCR with oLC11 and oLC1869. Colonies were also verified for the correct auxotrophy by patching on YNB supplemented with leucine, tryptophan, adenine, and uracil as well as by a lack of growth on plates lacking uracil.

**ScLC5038:** To express *C. albicans* HSP90<sup>K158ST162R</sup> in *S. cerevisiae*, plasmid pLC1005 (pAG424-*C. albicans* HSP90<sup>K158ST162R</sup>) was transformed into ScLC3048 and transformants were selected on YNB supplemented with leucine, tryptophan, and adenine. The presence of pLC1005 was verified by PCR using oLC3723 and 3441. Subsequently, ~10e7 cells were plated on 0.1% 5-FOA YPD agar plates to counter-select for the pKAT6 vector. An absence of pKAT6 was verified by PCR with oLC11 and oLC1869. Colonies were also verified for the correct auxotrophy by patching on YNB supplemented with leucine, tryptophan, adenine, and uracil as well as by a lack of growth on plates lacking uracil.

### **Plasmid Construction**

**pLC1003:** This plasmid is based on pLC868 but harbors T12Q mutation in *C. albicans* Hsp90. This mutation was introduced by site-directed mutagenesis with primers oLC5120 and oLC5121. Successful introduction of the desired mutation was sequence verified with oLC611, oLC755, oLC321, oLC322, and oLC23.

**pLC1004:** This plasmid is based on pLC868 but harbors L130A and F131Y mutations in Hsp90. These mutations were introduced by site-directed mutagenesis with primers oLC5122 and oLC5123. The successful introduction of the desired mutation was sequence verified with oLC611, oLC755, oLC321, oLC322, and oLC323.

**pLC1005:** This plasmid is based on pLC868 but harbors K158S and T162R mutations in Hsp90. These mutations were introduced by site-directed mutagenesis with primers oLC5124 and oLC5125. The successful introduction of the desired mutation was sequence verified with oLC611, oLC755, oLC321, oLC322, and oLC323.

### **Cloning and purification of recombinant *C. albicans* Hsp90 for biochemical studies**

Total RNA was isolated from log phase yeast culture using Trizol reagent and RT-PCR was used to obtain cDNA. *C. albicans* Hsp90 was amplified from *C. albicans* cDNA using the following primers: 5'GCATCCTCGAGATGGCTGACGCAAAGTTG 3' (forward primer) and

5'GCACGCCATGGTTAATCAACTTCCATAGCAG 3' (reverse primer). Amplified product was cloned in pRSET-A vector as a 6x-His tag fusion protein and transformed into *E. coli* DH5 $\alpha$  competent cells. Positive clones were confirmed by restriction digestion. For CaHsp90 protein purification, His-tagged CaHsp90 was expressed in *E. coli* RIL strains. Cells were grown at 37°C until the optical density of the culture reached 0.6. Induction was done with 0.5 mM IPTG at 30°C for 3 hours. Cell pellet was lysed in buffer containing 50 mM Tris-Cl pH 8.0, 1 mM imidazole, 2 mM PMSF. Protein was purified to homogeneity using Ni-NTA column.

### **K<sub>d</sub> determination for ATP binding using fluorescence spectroscopy**

The binding affinity of ATP to *C. albicans* Hsp90 was determined based on the property of intrinsic tryptophan fluorescence quenching by ligands. Briefly, purified Hsp90 (20  $\mu$ g/ml) was incubated with varying concentrations of ligand, ATP (100  $\mu$ M-3000  $\mu$ M) in binding buffer (40 mM HEPES-KOH buffer pH 7.4, 5 mM MgCl<sub>2</sub> and 100 mM KCl). Intrinsic tryptophan fluorescence was measured by scanning the emission spectrum from 300-400 nm at excitation at 280 nm. For K<sub>d</sub> calculations, the intensity at  $\lambda_{\text{max}}$  340 nm was selected. Difference in intrinsic fluorescence of protein alone and in presence of ATP was plotted against ATP concentration. GraphPad Prism 5.0 software was used to analyze the binding curve and non-linear regression analysis was done assuming single-site specific binding.

### **Pharmacological studies**

The sensitive and specific detection of CMLD013075 in biological media was accomplished by LC/MS analysis of acetonitrile extracts using a QExactive Orbitrap instrument coupled to a Dionex Ultimate UPLC system (Thermo Scientific). All determinations, both standards and experimental samples were performed in duplicate by the Whitehead Institute Metabolomics core facility. For plasma stability testing, compound (1  $\mu$ M) was incubated at 37 °C in K-EDTA anticoagulated plasma from CD-1 mice (Innovative Research) for periods of time ranging from 0 to 180 mins.



Duplicate aliquots (10  $\mu$ L) at each time point were extracted with 40  $\mu$ L of ice cold acetonitrile and shaken for 30 min at 4  $^{\circ}$ C. The acetonitrile solvent was spiked with 10 nM imatinib as an internal standard for mass spectrometry. Following extraction, samples were spun at 20,000 x g for 15 min and de-proteinated supernatants stored at -80  $^{\circ}$ C until analysis. Standard curves were prepared in plasma matrix and processed in parallel with the experimental samples. Microsome stability testing was performed in a similar manner except that incubation of compounds was performed in CD1 mouse liver microsomes (10 mg/ml, XenoTech, Cat #M1500) supplemented with an NADPH-regenerating system (XenoTech, Cat#K5000). Plasma pharmacokinetic studies in mice were performed under a protocol approved by the MIT Committee on Animal Care (CAC). CMLD013075 was formulated in cremophor EL vehicle (Sigma, #C5135) and administered via subcutaneous injection. At intervals post injection, cohorts of 3 mice were euthanized by CO<sub>2</sub> inhalation and whole blood collected by cardiac puncture into K-EDTA tubes. Samples were kept on ice until plasma was separated by centrifugation and stored at -80  $^{\circ}$ C until extraction and analysis as described above for plasma stability testing.
